# Supplementary material for: Enhancer of Zeste homolog 2 (EZH2) is overexpressed in recurrent nasopharyngeal carcinoma and is regulated by miR-26a, miR-101, and miR-98
Source: PubMed Central journal article supplement — Cell Death Dis. 2010 Oct 21;1(10):e85–. doi: 10.1038/cddis.2010.64 (PMC3035896; doi:10.1038/cddis.2010.64), 2010-10-21
Supplement: cddis201064x1.pdf [file cddis201064x1.pdf]

**A**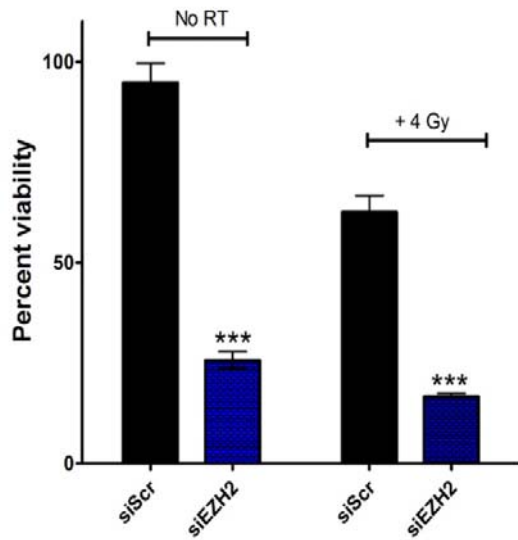**B**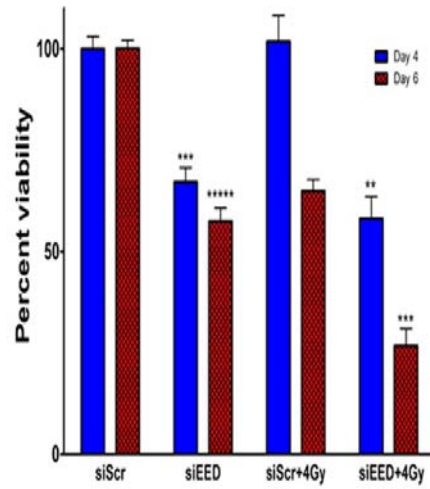

**Supplementary Figure 1. EZH2 and EED-depletion is lethal to NPC cells, related to figure 2.** C666-1 cells were transfected with 40 nM siRNA duplex targeting the EZH2 (A) or EED (B) transcript, cell viability was then measured on Day 6 using the MTS assay. Data are presented as mean  $\pm$  S.D., n=3-6. \*\* $p \leq 0.005$ ; \*\*\* $p \leq 0.0005$ ; \*\*\*\*\* $p \leq 0.000005$ .
