# Supplementary material for: Enhancer of Zeste homolog 2 (EZH2) is overexpressed in recurrent nasopharyngeal carcinoma and is regulated by miR-26a, miR-101, and miR-98
Source: PubMed Central journal article supplement — Cell Death Dis. 2010 Oct 21;1(10):e85–. doi: 10.1038/cddis.2010.64 (PMC3035896; doi:10.1038/cddis.2010.64), 2010-10-21
Supplement: cddis201064x2.pdf [file cddis201064x2.pdf]

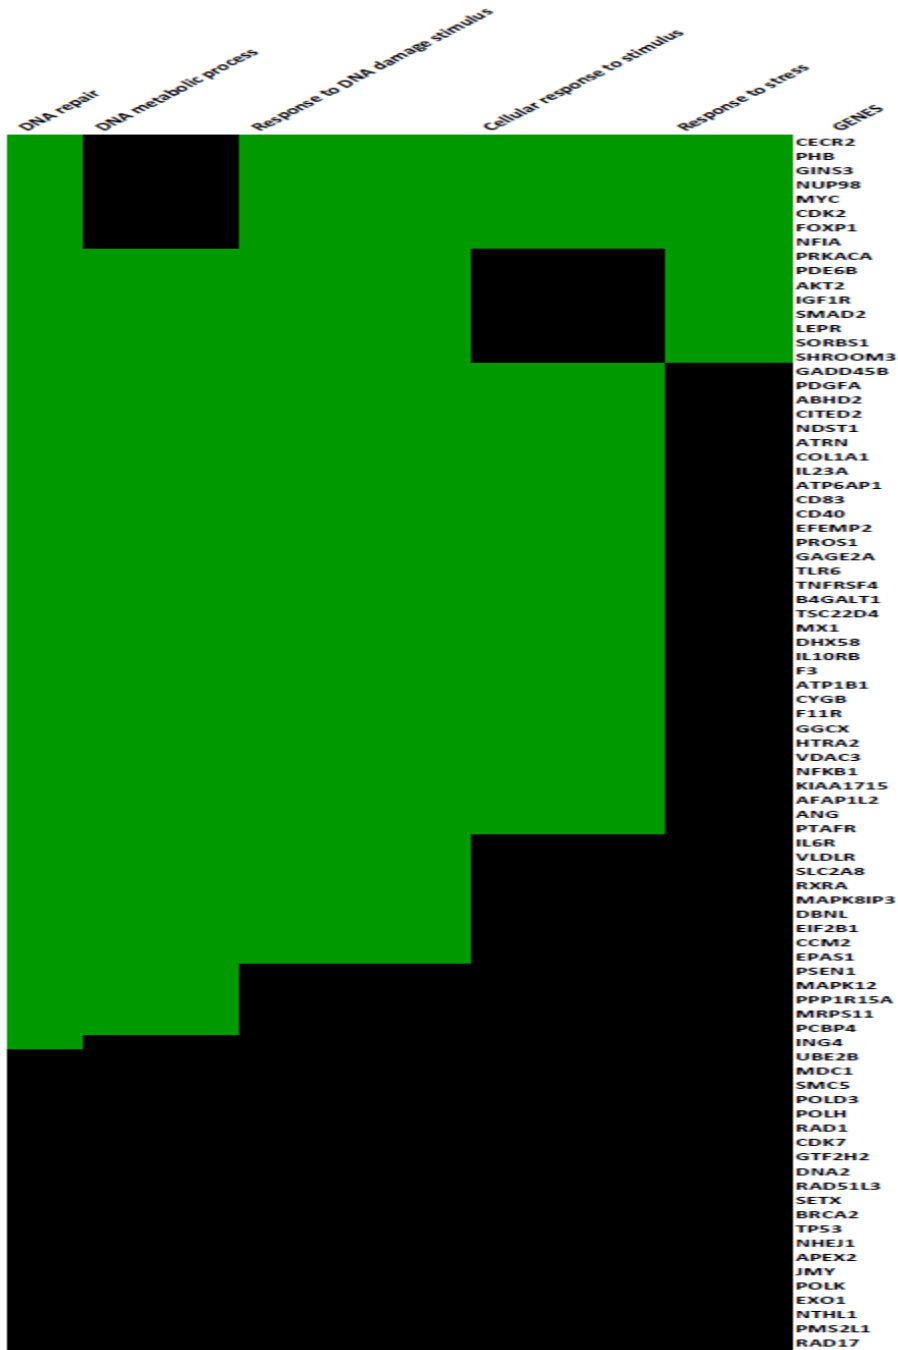

Supplementary Figure 2. Enrichment of a cluster of genes involved in the DNA repair & response to DNA damage in siEZH2 plus RT compared to siEZH2 cells.
