# Supplementary material for: Enhancer of Zeste homolog 2 (EZH2) is overexpressed in recurrent nasopharyngeal carcinoma and is regulated by miR-26a, miR-101, and miR-98
Source: PubMed Central journal article supplement — Cell Death Dis. 2010 Oct 21;1(10):e85–. doi: 10.1038/cddis.2010.64 (PMC3035896; doi:10.1038/cddis.2010.64), 2010-10-21
Supplement: cddis201064x3.pdf [file cddis201064x3.pdf]

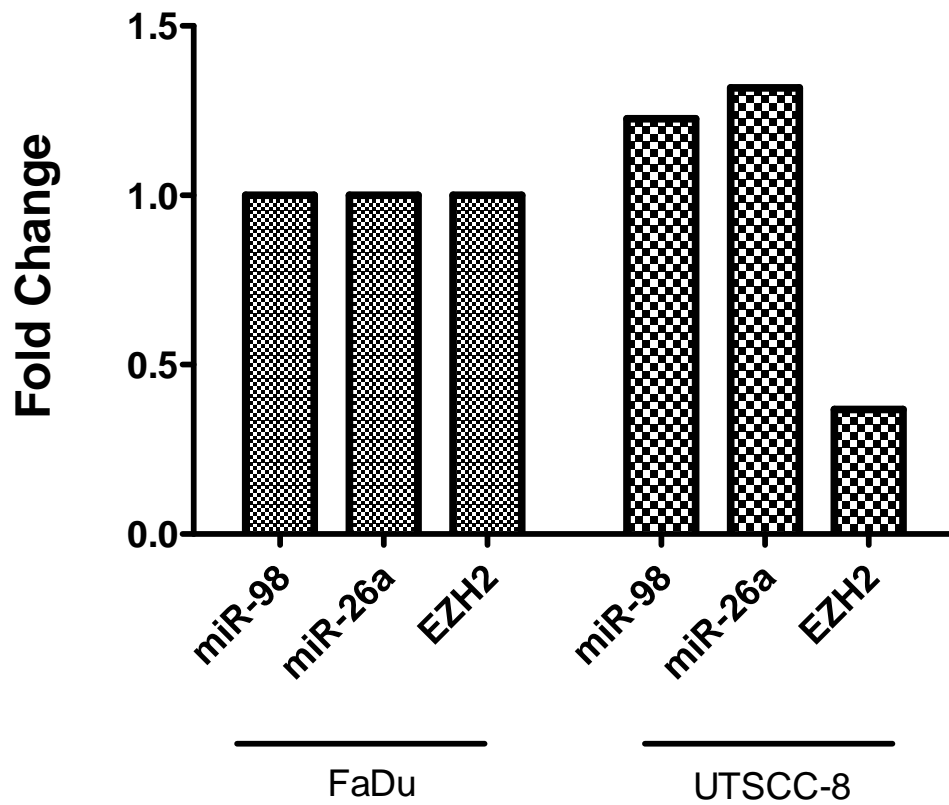

**Supplementary Figure 3. Inverse relationship between has-miR-98, has-miR-26a and EZH2 expression in FaDu (hypopharyngeal) and UTSCC-8 (laryngeal) carcinoma cell lines.**
