# Supplementary material for: Enhancer of Zeste homolog 2 (EZH2) is overexpressed in recurrent nasopharyngeal carcinoma and is regulated by miR-26a, miR-101, and miR-98
Source: PubMed Central journal article supplement — Cell Death Dis. 2010 Oct 21;1(10):e85–. doi: 10.1038/cddis.2010.64 (PMC3035896; doi:10.1038/cddis.2010.64), 2010-10-21
Supplement: cddis201064x4.pdf [file cddis201064x4.pdf]

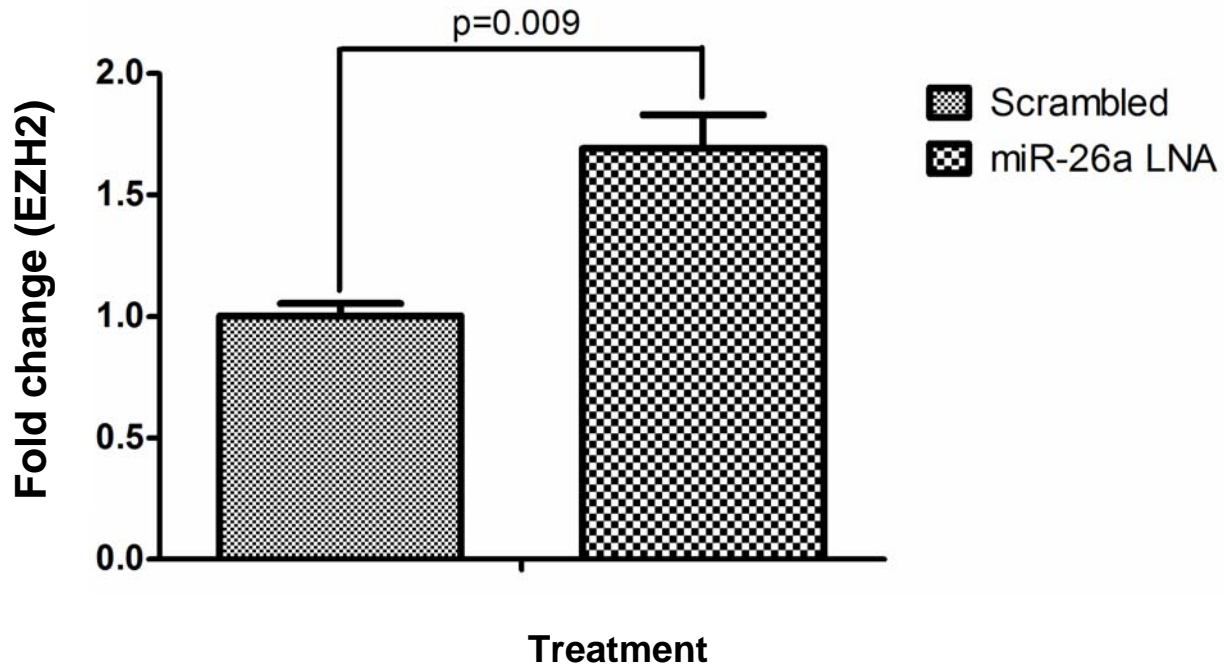

**Supplementary Figure 4. Effects of miR-26a knockdown on EZH2 expression.** FaDu cells were transfected with 40 nM LNA-miR-26a or LNA-Scrambled and then expression of EZH2 was measured by qRT-PCR at 48 hrs post transfection. Data are presented as mean  $\pm$  S.E., n=3.
