# Supplementary material for: Enhancer of Zeste homolog 2 (EZH2) is overexpressed in recurrent nasopharyngeal carcinoma and is regulated by miR-26a, miR-101, and miR-98
Source: PubMed Central journal article supplement — Cell Death Dis. 2010 Oct 21;1(10):e85–. doi: 10.1038/cddis.2010.64 (PMC3035896; doi:10.1038/cddis.2010.64), 2010-10-21
Supplement: cddis201064x5.pdf [file cddis201064x5.pdf]

**Supplementary Table 1. List of differentially expressed genes (>2-fold change) between C666-1 cells transfected with siEZH2, compared to control cells, at 72 hrs post-transfection.**

| <b>Probe ID</b> | <b>Gene Symbol</b> | <b>Fold Change</b> |
|-----------------|--------------------|--------------------|
| 204734_at       | KRT15              | 39.65008649        |
| 226234_at       | ---                | 15.80679406        |
| 207935_s_at     | KRT13              | 14.98284713        |
| 211580_s_at     | PIK3R3             | 8.315292074        |
| 212925_at       | C19orf21           | 7.757797443        |
| 201012_at       | ANXA1              | 5.425319304        |
| 203407_at       | PPL                | 5.455863825        |
| 220237_at       | ATG3               | 4.949300904        |
| 204864_s_at     | IL6ST              | 4.019233264        |
| 241718_x_at     | ---                | 6.77471781         |
| 223594_at       | TMEM117            | 4.437498006        |
| 212417_at       | SCAMP1             | 4.756170149        |
| 206576_s_at     | CEACAM1            | 4.44294286         |
| 207522_s_at     | ATP2A3             | 4.395603964        |
| 212937_s_at     | COL6A1             | 7.412719129        |
| 224336_s_at     | DUSP16             | 3.511335094        |
| 219850_s_at     | EHF                | 3.116781617        |
| 207069_s_at     | SMAD6              | 3.335894724        |
| 216915_s_at     | PTPN12             | 3.291291155        |
| 223635_s_at     | SSBP3              | 3.866499753        |
| 203417_at       | MFAP2              | 3.613603663        |
| 234335_s_at     | FAM84A             | 2.988447249        |
| 217657_at       | BCAP29             | 4.156691172        |
| 211883_x_at     | CEACAM1            | 4.308498868        |
| 224558_s_at     | MALAT1             | 3.327955538        |
| 207761_s_at     | METTL7A            | 3.123493454        |
| 219520_s_at     | WWC3               | 2.73800661         |
| 205634_x_at     | ZDHHC24            | 3.595500659        |
| 205162_at       | ERCC8              | 3.186988292        |
| 224260_at       | ---                | 3.415534893        |
| 226476_s_at     | VPRBP              | 3.025880705        |
| 221881_s_at     | CLIC4              | 2.667642078        |
| 225305_at       | SLC25A29           | 2.489655338        |
| AFFX-PheX-5_a   | ---                | 2.429452279        |
| 204560_at       | FKBP5              | 2.741268184        |
| 205356_at       | USP13              | 2.814927544        |
| 225912_at       | TP53INP1           | 2.456868499        |
| 219135_s_at     | LMF1               | 3.246185161        |
| 205398_s_at     | SMAD3              | 2.810810066        |
| 231698_at       | FLJ36848           | 2.376039861        |

|              |               |             |
|--------------|---------------|-------------|
| 220189_s_at  | MGAT4B        | 2.398542781 |
| 240690_at    | ---           | 2.52091776  |
| 1569470_a_at | FRMD5         | 2.269558896 |
| 200622_x_at  | CALM3         | 2.941941832 |
| 218532_s_at  | FAM134B       | 3.63485989  |
| 1565544_at   | RNF141        | 2.294284149 |
| 203665_at    | HMOX1         | 3.037048474 |
| 244653_at    | SETD7         | 2.288417384 |
| 208997_s_at  | UCP2          | 3.869707948 |
| 232242_at    | ---           | 2.265455585 |
| 234192_s_at  | GKAP1         | 2.258834226 |
| 211135_x_at  | LILRB3        | 6.060890307 |
| 212728_at    | DLG3          | 3.04071739  |
| 244356_at    | ---           | 3.895979103 |
| 231258_at    | ---           | 3.501422316 |
| 205102_at    | TMPRSS2       | 2.281412437 |
| 237330_at    | ---           | 2.182730965 |
| 229256_at    | PGM2L1        | 3.211680765 |
| 230161_at    | ---           | 2.349159879 |
| 50314_i_at   | C20orf27      | 4.079706958 |
| 1553693_s_at | CBR4          | 2.200136538 |
| 202831_at    | GPX2          | 2.76586655  |
| 1564962_at   | ZNF92         | 2.145210177 |
| 238568_s_at  | ---           | 2.121586359 |
| 221541_at    | CRISPLD2      | 2.122364061 |
| 203792_x_at  | PCGF2         | 2.238956875 |
| 1552325_at   | CCDC11        | 2.420707624 |
| 203157_s_at  | GLS           | 4.966199475 |
| 225600_at    | LOC286144     | 2.885893019 |
| 239136_at    | hCG_1818231   | 2.727403731 |
| 220266_s_at  | KLF4          | 3.15471756  |
| 204097_s_at  | RBMX2         | 2.343004489 |
| 236070_at    | LOC388963     | 3.25397565  |
| 205797_s_at  | TCP11L1       | 4.336883028 |
| 216202_s_at  | SPTLC2        | 2.978405059 |
| 244167_at    | ---           | 4.201186244 |
| 1554039_at   | C14orf159     | 3.943704342 |
| 1556222_at   | RP11-291L22.2 | 3.579267095 |
| 205415_s_at  | ATXN3         | 4.232511179 |
| 227062_at    | TncRNA        | 2.049701571 |
| 213426_s_at  | CAV2          | 5.121317479 |
| 201229_s_at  | ARIH2         | 5.489151992 |
| 220050_at    | C9orf9        | 3.458201806 |
| 202755_s_at  | GPC1          | 2.889460887 |
| 200722_s_at  | CAPRIN1       | 2.172575409 |

|             |                      |             |
|-------------|----------------------|-------------|
| 210251_s_at | RUFY3                | 2.561872832 |
| 223019_at   | FAM129B              | 2.135313091 |
| 227222_at   | FBXO10               | 0.401029711 |
| 235670_at   | ---                  | 0.391304173 |
| 225112_at   | ABI2                 | 0.449038948 |
| 1558236_at  | ---                  | 0.415794121 |
| 202668_at   | EFNB2                | 0.486997643 |
| 209770_at   | BTN3A1               | 0.441489782 |
| 240115_at   | ---                  | 0.385287664 |
| 230425_at   | EPHB1                | 0.471797158 |
| 233174_at   | ---                  | 0.492944895 |
| 213326_at   | VAMP1                | 0.42501352  |
| 201556_s_at | VAMP2                | 0.433910252 |
| 242702_at   | ---                  | 0.409791124 |
| 200950_at   | ARPC1A               | 0.464238607 |
| 1555964_at  | ARL17 /// ARL17P1    | 0.422645383 |
| 230818_at   | ---                  | 0.394242309 |
| 202377_at   | LEPR /// LEPROT      | 0.456945167 |
| 214951_at   | SLC26A10             | 0.411726796 |
| 240310_at   | ---                  | 0.383350811 |
| 203837_at   | LOC729144 /// MAP3K5 | 0.46067834  |
| 228994_at   | CCDC24               | 0.448868276 |
| 231269_at   | ASCC3                | 0.449281742 |
| 1554131_at  | KIAA1128             | 0.480616347 |
| 213248_at   | LOC730101            | 0.438457448 |
| 205659_at   | HDAC9                | 0.47224047  |
| 209546_s_at | APOL1                | 0.480400291 |
| 222231_s_at | LRRC59               | 0.464441153 |
| 242847_at   | C11orf30             | 0.431787314 |
| 230669_at   | RASA2                | 0.402271535 |
| 1555870_at  | RNF207               | 0.406610363 |
| 203915_at   | CXCL9                | 0.402785878 |
| 203225_s_at | RFK                  | 0.400676007 |
| 225557_at   | AXUD1                | 0.485552239 |
| 230560_at   | STXBP6               | 0.403083159 |
| 224843_at   | SLAIN2               | 0.386448319 |
| 235240_at   | ATXN3                | 0.460822479 |
| 213160_at   | DOCK2                | 0.438602498 |
| 49679_s_at  | MT1P3                | 0.402793191 |
| 220773_s_at | GPHN                 | 0.462855873 |
| 233021_at   | ---                  | 0.41702232  |
| 220841_s_at | AHI1                 | 0.414392095 |
| 220251_at   | C1orf107             | 0.41127739  |
| 208903_at   | RPS28                | 0.47598647  |
| 229074_at   | ---                  | 0.408945428 |

|              |           |             |
|--------------|-----------|-------------|
| 218872_at    | TESC      | 0.438639408 |
| 225858_s_at  | BIRC4     | 0.467783568 |
| 228479_at    | ---       | 0.365485441 |
| 243179_at    | ---       | 0.44459746  |
| 203110_at    | PTK2B     | 0.424107451 |
| 217996_at    | PHLDA1    | 0.450639523 |
| 222050_at    | FXR2      | 0.399019731 |
| 225972_at    | TMEM64    | 0.380509152 |
| 232772_at    | LOC221272 | 0.411805728 |
| 213734_at    | WSB2      | 0.397410707 |
| 1569181_x_at | ---       | 0.416008935 |
| 203226_s_at  | TSPAN31   | 0.453933817 |
| 223595_at    | TMEM133   | 0.412280559 |
| 224367_at    | BEX2      | 0.418625936 |
| 202782_s_at  | SKIP      | 0.416084629 |
| 224525_s_at  | OLA1      | 0.377437757 |
| 1558445_at   | ---       | 0.362691012 |
| 204949_at    | ICAM3     | 0.416744169 |
| 206332_s_at  | IFI16     | 0.361369691 |
| 229384_at    | ---       | 0.428622369 |
| 236922_at    | ---       | 0.37995208  |
| 227623_at    | ---       | 0.38450542  |
| 218588_s_at  | C5orf3    | 0.407713876 |
| 235533_at    | COX19     | 0.452827966 |
| 1569129_s_at | ---       | 0.4101242   |
| 204268_at    | S100A2    | 0.435114416 |
| 226030_at    | ACADSB    | 0.397446538 |
| 212609_s_at  | AKT3      | 0.448622073 |
| 217039_x_at  | IGHG1     | 0.405036303 |
| 205599_at    | TRAF1     | 0.463374997 |
| 1555860_x_at | ---       | 0.389348221 |
| 224964_s_at  | GNG2      | 0.429202943 |
| 244164_at    | ---       | 0.454986628 |
| 228391_at    | CYP4V2    | 0.459676211 |
| 204548_at    | STAR      | 0.388041224 |
| 232493_at    | ---       | 0.453234729 |
| 212764_at    | ---       | 0.388232997 |
| 208112_x_at  | EHD1      | 0.456962719 |
| 230479_at    | ---       | 0.358965545 |
| 210278_s_at  | AP4S1     | 0.375674725 |
| 232004_at    | HNRNPR    | 0.387098582 |
| 236004_at    | ---       | 0.406603421 |
| 204251_s_at  | CEP164    | 0.374297303 |
| 225430_at    | GATC      | 0.358521916 |
| 242790_at    | SNF8      | 0.451308655 |

|              |                |             |
|--------------|----------------|-------------|
| 228771_at    | ADRBK2         | 0.353487183 |
| 233020_at    | ---            | 0.397932902 |
| 213463_s_at  | FAM149B1       | 0.369283744 |
| 237172_at    | ---            | 0.417209829 |
| 234936_s_at  | CC2D2A         | 0.357748424 |
| 48612_at     | N4BP1          | 0.42167115  |
| 238252_at    | ---            | 0.37582685  |
| 1557961_s_at | NECAB1         | 0.356780296 |
| 237054_at    | ---            | 0.449006649 |
| 1556558_s_at | FLJ36665       | 0.377676722 |
| 229590_at    | RPL13          | 0.449428374 |
| 220073_s_at  | PLEKHG6        | 0.433411163 |
| 209368_at    | EPHX2          | 0.407139724 |
| 227531_at    | ---            | 0.363904844 |
| 1569194_at   | ZNF789         | 0.428890121 |
| 203633_at    | CPT1A          | 0.443655519 |
| 243688_at    | LOC285431      | 0.423482815 |
| 230962_at    | ---            | 0.352748834 |
| 208712_at    | CCND1          | 0.440660542 |
| 1556938_a_at | ---            | 0.419118461 |
| 230650_at    | ---            | 0.333976331 |
| 213489_at    | MAPRE2         | 0.338680269 |
| 225012_at    | HDLBP          | 0.403284742 |
| 206101_at    | ECM2           | 0.355285948 |
| 229697_at    | HIRIP3         | 0.373016375 |
| 227677_at    | JAK3           | 0.435039388 |
| 230052_s_at  | TA-NFKBH       | 0.404912973 |
| 222111_at    | ---            | 0.339800454 |
| 235590_at    | C10orf6        | 0.329233495 |
| 242723_at    | ---            | 0.354389138 |
| 212136_at    | ATP2B4         | 0.392405211 |
| 46323_at     | CANT1          | 0.404338275 |
| 205103_at    | C1orf61        | 0.344651354 |
| 231850_x_at  | KIAA1712       | 0.351276086 |
| 244795_at    | UQCC           | 0.327952306 |
| 229518_at    | FAM46B         | 0.42777066  |
| 207426_s_at  | TNFSF4         | 0.336759353 |
| 225343_at    | TMED8          | 0.331226786 |
| 31637_s_at   | NR1D1 /// THRA | 0.365777354 |
| 236704_at    | ---            | 0.322468195 |
| 235965_at    | ---            | 0.399926558 |
| 1554751_at   | ---            | 0.353459298 |
| 228396_at    | PRKG1          | 0.34523786  |
| 214136_at    | NUDT13         | 0.362741938 |
| 236118_at    | LOC728473      | 0.420790803 |

|              |                     |             |
|--------------|---------------------|-------------|
| 200962_at    | RPL31               | 0.353693447 |
| 232446_at    | MGC45800            | 0.368025051 |
| 228914_at    | ---                 | 0.347573831 |
| 235566_at    | TMF1                | 0.334895666 |
| 1569180_at   | ---                 | 0.396050154 |
| 228967_at    | EIF1                | 0.314868486 |
| 215078_at    | SOD2                | 0.396307007 |
| 244523_at    | MMD                 | 0.346163954 |
| 218858_at    | DEPDC6              | 0.400423794 |
| 220513_at    | KHDC1               | 0.321037261 |
| 231867_at    | ODZ2                | 0.339154438 |
| 213295_at    | CYLD                | 0.308792878 |
| 238183_at    | ---                 | 0.324489689 |
| 238576_at    | ---                 | 0.309999661 |
| 228338_at    | LOC120376           | 0.395985283 |
| 226873_at    | ---                 | 0.306926153 |
| 242939_at    | TFDP1               | 0.337218194 |
| 238146_at    | ---                 | 0.337441908 |
| 206027_at    | S100A3              | 0.401469623 |
| 213172_at    | TTC9                | 0.291405614 |
| 243417_at    | ---                 | 0.366029686 |
| 213213_at    | DIDO1               | 0.375522112 |
| 202445_s_at  | NOTCH2              | 0.38407305  |
| 222802_at    | EDN1                | 0.387719199 |
| 219064_at    | ITIH5               | 0.381030347 |
| 228068_at    | C10orf132           | 0.292860854 |
| 241782_at    | NEBL                | 0.286830143 |
| 235611_at    | ---                 | 0.334709772 |
| 207356_at    | DEFB4 /// DEFB4P    | 0.291182517 |
| 212975_at    | DENND3              | 0.282602216 |
| 235452_at    | ---                 | 0.274973956 |
| 221908_at    | TMEM118             | 0.31400542  |
| 1564688_a_at | RAD9B               | 0.304305761 |
| 217966_s_at  | FAM129A             | 0.347517734 |
| 237865_x_at  | ---                 | 0.274361138 |
| 220157_x_at  | PLEKHA8 /// PLEKHA9 | 0.327344348 |
| 229635_at    | ---                 | 0.30978573  |
| 1565558_at   | ---                 | 0.358030785 |
| 239278_at    | ---                 | 0.28588585  |
| 238975_at    | MMAB                | 0.340364711 |
| 242610_x_at  | ---                 | 0.337467627 |
| 223217_s_at  | NFKBIZ              | 0.291283468 |
| 240030_at    | COMMD6              | 0.347993182 |
| 214735_at    | PIP3-E              | 0.286885393 |
| 236887_at    | KIN                 | 0.247266573 |

|             |               |             |
|-------------|---------------|-------------|
| 244035_at   | ---           | 0.293540101 |
| 212947_at   | SLC9A8        | 0.256055871 |
| 235980_at   | PIK3CA        | 0.293823444 |
| 242807_at   | FSD1L         | 0.33939374  |
| 223426_s_at | EPB41L4B      | 0.284909441 |
| 236595_at   | ---           | 0.277238333 |
| 229473_at   | MAMDC4        | 0.327462248 |
| 232576_at   | ---           | 0.247686543 |
| 1556643_at  | FAM125A       | 0.272171309 |
| 244767_at   | ---           | 0.283896599 |
| 226397_s_at | ---           | 0.246855085 |
| 209889_at   | SEC31B        | 0.287699437 |
| 209541_at   | IGF1          | 0.218060852 |
| 233305_at   | NECAB1        | 0.306053959 |
| 239503_at   | ---           | 0.210613167 |
| 232397_at   | ---           | 0.21663115  |
| 206418_at   | NOX1          | 0.271041753 |
| 228042_at   | ADPRH         | 0.268336274 |
| 227585_at   | ---           | 0.262521016 |
| 236090_at   | ---           | 0.340827819 |
| 210255_at   | RAD51L1       | 0.409100263 |
| 242750_at   | MMAA          | 0.380171758 |
| 226441_at   | ---           | 0.376202921 |
| 231886_at   | DKFZP434B2016 | 0.427911217 |
| 235483_at   | ---           | 0.327058099 |
| 203731_s_at | ZKSCAN5       | 0.405166463 |
| 213403_at   | ---           | 0.444799268 |
| 227932_at   | ARIH2         | 0.467150791 |
| 202837_at   | TRAFD1        | 0.451451503 |
| 212880_at   | WDR7          | 0.425912933 |
| 227213_at   | ADAT2         | 0.303491484 |
| 226901_at   | C17orf58      | 0.464968727 |
| 227565_at   | ---           | 0.394182486 |
| 243456_at   | ZNF214        | 0.412600523 |
| 216028_at   | DKFZP564C152  | 0.394938825 |
| 1560446_at  | ---           | 0.459285813 |
| 227164_at   | SFRS1         | 0.373533623 |
| 224517_at   | POLR2J4       | 0.408846832 |
| 241394_at   | LOC284120     | 0.450236435 |
| 224185_at   | ---           | 0.363326685 |
| 236105_at   | ZBTB10        | 0.249943666 |
| 225282_at   | SMAP1L        | 0.421440878 |
| 226648_at   | HIF1AN        | 0.458848411 |
| 224496_s_at | TMEM107       | 0.441050685 |
| 212580_at   | ERAP1         | 0.448656035 |

|              |                         |             |
|--------------|-------------------------|-------------|
| 59705_at     | ---                     | 0.439836556 |
| 225193_at    | KIAA1967                | 0.426525791 |
| 243982_at    | KLHL28                  | 0.434593202 |
| 230069_at    | SFXN1                   | 0.437720859 |
| 1554752_a_at | ---                     | 0.263526538 |
| 1564474_at   | LOC728723               | 0.350476267 |
| 222584_at    | LOC731059 /// MSTO1     | 0.458003773 |
| 218021_at    | DHRS4 /// DHRS4L2       | 0.396914566 |
| 206134_at    | ADAMDEC1                | 0.451672792 |
| 232171_x_at  | KLHDC4                  | 0.449679905 |
| 1554609_at   | POLD3                   | 0.44779704  |
| 203234_at    | UPP1                    | 0.30119007  |
| 239848_at    | ---                     | 0.311122893 |
| 226569_s_at  | CHTF18                  | 0.434165049 |
| 207156_at    | HIST1H2AG               | 0.425605127 |
| 241825_at    | C2orf60                 | 0.317822295 |
| 236095_at    | NTRK2                   | 0.210917308 |
| 208741_at    | SAP18                   | 0.39966644  |
| 239775_at    | ---                     | 0.439295127 |
| 220302_at    | MAK                     | 0.322101494 |
| 232395_x_at  | AGBL3                   | 0.35749516  |
| 219424_at    | EBI3                    | 0.197317024 |
| 239493_at    | ---                     | 0.45734391  |
| 231019_x_at  | STK11                   | 0.354415552 |
| 1569878_at   | CCNYL2                  | 0.434647332 |
| 241344_at    | ---                     | 0.284735815 |
| 1569607_s_at | ANKRD20A1 /// ANKRD2    | 0.422753574 |
| 206140_at    | LHX2                    | 0.397425196 |
| 244889_at    | LOC388210               | 0.29809216  |
| 228153_at    | RNF144B                 | 0.329955161 |
| 241924_at    | ---                     | 0.413653255 |
| 212461_at    | AZIN1                   | 0.410326524 |
| 202541_at    | SCYE1                   | 0.428952098 |
| 239277_at    | ---                     | 0.387489357 |
| 219306_at    | KIF15                   | 0.445816297 |
| 228185_at    | ZNF25                   | 0.446429928 |
| 231017_at    | STK11                   | 0.344227011 |
| 238678_at    | tcag7.907               | 0.406952062 |
| 203742_s_at  | LOC645233 /// LOC73236  | 0.385210245 |
| 226511_at    | WDR32                   | 0.448917056 |
| 227298_at    | FLJ37798                | 0.45203633  |
| 60815_at     | POLR2J4                 | 0.431808569 |
| 223119_s_at  | USP47                   | 0.202516215 |
| 210162_s_at  | NFATC1                  | 0.318966304 |
| 208155_x_at  | GAGE1 /// GAGE12G /// C | 0.41799625  |



|              |                      |             |
|--------------|----------------------|-------------|
| 212403_at    | UBE3B                | 0.44521012  |
| 221711_s_at  | C19orf62             | 0.439669959 |
| 222426_at    | MAPKAP1              | 0.44763491  |
| 232569_at    | ---                  | 0.352778021 |
| 237159_x_at  | AP1S3                | 0.301577595 |
| 236506_at    | ---                  | 0.42375201  |
| 1564359_a_at | LOC339260            | 0.444653577 |
| 224755_at    | ---                  | 0.410949487 |
| 243976_at    | ---                  | 0.379346045 |
| 238508_at    | DBF4B                | 0.414763469 |
| 206435_at    | B4GALNT1             | 0.42243939  |
| 208776_at    | PSMD11               | 0.26169768  |
| 243071_at    | ---                  | 0.314377561 |
| 213333_at    | MDH2                 | 0.369322115 |
| 228797_at    | ---                  | 0.408180742 |
| 1552626_a_at | TMEM163              | 0.188300013 |
| 239329_at    | ---                  | 0.340751858 |
| 231384_at    | ---                  | 0.339918859 |
| 216834_at    | RGS1                 | 0.190564168 |
| 228562_at    | ZBTB10               | 0.437860827 |
| 236699_at    | ---                  | 0.420199675 |
| 238822_at    | ---                  | 0.32094523  |
| 235482_at    | LOC400960            | 0.449051104 |
| 228198_s_at  | LOC729234            | 0.295840102 |
| 222665_at    | FAM82B /// LOC642197 | 0.451935077 |
| 236487_at    | SCLT1                | 0.426299441 |
| 221210_s_at  | NPL                  | 0.447928073 |
| 228722_at    | PRMT2                | 0.414605866 |
| 212454_x_at  | HNRPDL               | 0.433033647 |
| 227665_at    | ---                  | 0.354418431 |
| 1559524_at   | ---                  | 0.403615671 |
| 227927_at    | ---                  | 0.428751387 |
| 205726_at    | DIAPH2               | 0.30837036  |
| 231864_at    | ZNF33A               | 0.436511601 |
| 235046_at    | ---                  | 0.251485143 |
| 219703_at    | MNS1                 | 0.394038014 |
| 237154_at    | ---                  | 0.283064967 |
| 215942_s_at  | GTSE1                | 0.436424007 |
| 225111_s_at  | NAPB                 | 0.423785028 |
| 214790_at    | SENP6                | 0.437819112 |
| 202490_at    | IKBKAP               | 0.412909964 |
| 225098_at    | ABI2                 | 0.39275803  |
| 228160_at    | LOC400642            | 0.295374409 |
| 217679_x_at  | ---                  | 0.448885836 |
| 213645_at    | ENOSF1               | 0.34306686  |

|              |                        |             |
|--------------|------------------------|-------------|
| 229520_s_at  | C14orf118              | 0.337102885 |
| 240079_at    | ZNF81                  | 0.263170486 |
| 213970_at    | LOC653256 /// RABL3    | 0.424061953 |
| 219495_s_at  | ZNF180                 | 0.401730152 |
| 224772_at    | NAV1                   | 0.420595969 |
| 65630_at     | TMEM80                 | 0.445705144 |
| 207861_at    | CCL22                  | 0.29416066  |
| 213500_at    | ---                    | 0.314622545 |
| 1569577_x_at | ---                    | 0.238631083 |
| 205220_at    | GPR109B                | 0.329424324 |
| 78383_at     | TOPORS                 | 0.441175635 |
| 223302_s_at  | ZNF655                 | 0.436314066 |
| 229348_at    | ---                    | 0.290698579 |
| 235572_at    | SPC24                  | 0.355494576 |
| 207086_x_at  | CTD-2248C21.2 /// GAGE | 0.424209414 |
| 232205_at    | ---                    | 0.416954746 |
| 1552787_at   | HELB                   | 0.323184706 |
| 222275_at    | ---                    | 0.442432913 |
| 227462_at    | ---                    | 0.35447003  |
| 230821_at    | ZNF148                 | 0.222049006 |
| 204262_s_at  | PSEN2                  | 0.369843432 |
| 237210_at    | NFRKB                  | 0.428612615 |
| 206640_x_at  | GAGE12C /// GAGE12D /, | 0.437061803 |
| 223218_s_at  | NFKBIZ                 | 0.324977918 |
| 231412_at    | DKFZp686L14188         | 0.297006085 |
| 236598_at    | ---                    | 0.428165409 |
| 228213_at    | H2AFJ                  | 0.438609826 |
| 202057_at    | KPNA1                  | 0.407622593 |
| 217790_s_at  | SSR3                   | 0.270886777 |
| 222824_at    | ---                    | 0.374446979 |
| 228937_at    | C13orf31               | 0.359523189 |
| 233527_at    | ---                    | 0.37487468  |
| 235505_s_at  | ---                    | 0.444125791 |
| 221877_at    | ---                    | 0.380014837 |
| 230721_at    | C16orf52               | 0.420954131 |
| 235175_at    | GBP4                   | 0.329663666 |
| 223176_at    | KCTD20                 | 0.357538824 |
| 243606_at    | ---                    | 0.247667919 |
| 237083_at    | ---                    | 0.322053727 |
| 235289_at    | EIF5A2                 | 0.266326027 |
| 227627_at    | SGK3                   | 0.324340123 |
| 1554101_a_at | TMTC4                  | 0.418706355 |
| 202155_s_at  | NUP214                 | 0.419332468 |
| 226982_at    | ELL2                   | 0.209052544 |
| 1555886_at   | PDSS2                  | 0.407741296 |

|             |                        |             |
|-------------|------------------------|-------------|
| 205308_at   | C8orf70                | 0.42746564  |
| 222032_s_at | USP7                   | 0.377636727 |
| 219316_s_at | FLVCR2                 | 0.400390652 |
| 230571_at   | ---                    | 0.379517797 |
| 242286_at   | ---                    | 0.224645495 |
| 231550_at   | ---                    | 0.345527842 |
| 220399_at   | FLJ22639 /// LOC728686 | 0.297222733 |
| 203574_at   | NFIL3                  | 0.416414051 |
| 225109_at   | ---                    | 0.419233468 |
| 229155_at   | ---                    | 0.441941354 |
| 218253_s_at | LGTN                   | 0.333942988 |
| 241808_at   | ---                    | 0.350378942 |
| 209161_at   | PRPF4                  | 0.346895699 |
| 204294_at   | AMT                    | 0.271219012 |
| 215022_x_at | ZNF33B                 | 0.36537351  |
| 229158_at   | WNK4                   | 0.419658544 |
| 206036_s_at | REL                    | 0.439987752 |
| 221965_at   | MPHOSPH9               | 0.432656312 |
| 206352_s_at | PEX10                  | 0.367273839 |
| 242255_at   | WDR37                  | 0.426432773 |
| 238026_at   | RPL35A                 | 0.424167332 |
| 235785_at   | ---                    | 0.315969737 |
| 212976_at   | ---                    | 0.316559231 |
| 229588_at   | DNAJC10                | 0.299002988 |
| 244350_at   | MYO10                  | 0.432419771 |
| 226826_at   | ---                    | 0.363332849 |
| 217598_at   | ---                    | 0.382106842 |
| 239484_at   | ---                    | 0.406624637 |
| 235061_at   | PPM1K                  | 0.355344155 |
| 205042_at   | GNE                    | 0.395490677 |
| 209005_at   | FBXL5                  | 0.349262753 |
| 241689_at   | ---                    | 0.422279447 |
| 228013_at   | ---                    | 0.336492841 |
| 1556646_at  | ---                    | 0.296722899 |
| 236009_at   | ---                    | 0.298548911 |
| 229180_at   | ---                    | 0.327240406 |
| 202859_x_at | IL8                    | 0.243582107 |
| 1553974_at  | C22orf39               | 0.372573117 |
| 214816_x_at | C19orf40               | 0.421143332 |
| 229170_s_at | TTC18                  | 0.393978711 |
| 236165_at   | MSL3L1                 | 0.272136423 |
| 207231_at   | DZIP3                  | 0.388323265 |
| 229375_at   | ---                    | 0.347602831 |
| 213383_at   | SAPS2                  | 0.394089155 |
| 1553736_at  | CCDC131                | 0.30139622  |

|             |              |             |
|-------------|--------------|-------------|
| 236247_at   | NSUN4        | 0.422830683 |
| 218562_s_at | TMEM57       | 0.378370278 |
| 232054_at   | PCDH20       | 0.35106899  |
| 201822_at   | TIMM17A      | 0.373574442 |
| 214235_at   | CYP3A5       | 0.18953365  |
| 204739_at   | CENPC1       | 0.380734283 |
| 225710_at   | GNB4         | 0.362836318 |
| 226753_at   | FAM76B       | 0.400817179 |
| 244534_at   | ---          | 0.309271611 |
| 34868_at    | SMG5         | 0.366412349 |
| 201772_at   | AZIN1        | 0.3877497   |
| 203298_s_at | JARID2       | 0.387930728 |
| 1559827_at  | LOC401074    | 0.361570377 |
| 235635_at   | ARHGAP5      | 0.340070593 |
| 213351_s_at | TMCC1        | 0.422474    |
| 212690_at   | DDHD2        | 0.268718215 |
| 215305_at   | PDGFRA       | 0.298090486 |
| 1554067_at  | FLJ32549     | 0.398336962 |
| 204794_at   | DUSP2        | 0.299016126 |
| 228190_at   | CTR9         | 0.386284905 |
| 225230_at   | TMEM77       | 0.423581195 |
| 227615_at   | CTB-1048E9.5 | 0.423755274 |
| 244569_at   | C8orf37      | 0.313121257 |
| 228014_at   | PTRH1        | 0.385665569 |
| 227333_at   | ---          | 0.248760881 |
| 204950_at   | CARD8        | 0.333610594 |
| 242003_at   | ERICH1       | 0.417348725 |
| 224897_at   | WDR26        | 0.376868429 |
| 229317_at   | ---          | 0.318313347 |
| 230350_at   | ---          | 0.36914921  |
| 221978_at   | HLA-F        | 0.301882089 |
| 1557799_at  | C11orf31     | 0.404720464 |
| 226821_at   | ---          | 0.288665756 |
| 237571_at   | ---          | 0.16745874  |
| 232156_at   | ---          | 0.424631658 |
| 224763_at   | RPL37        | 0.319951242 |
| 217645_at   | C14orf112    | 0.378627798 |
| 242639_at   | NARG2        | 0.348446043 |
| 209162_s_at | PRPF4        | 0.399698963 |
| 235677_at   | SRR          | 0.361542157 |
| 228548_at   | ---          | 0.318543131 |
| 229014_at   | FLJ42709     | 0.319800182 |
| 209684_at   | RIN2         | 0.30778694  |
| 239760_at   | ---          | 0.413467266 |
| 230234_at   | ---          | 0.317656038 |

|              |                        |             |
|--------------|------------------------|-------------|
| 213049_at    | GARNL1                 | 0.387663655 |
| 239042_at    | TSR1                   | 0.319346056 |
| 222941_at    | FLJ11850               | 0.426950888 |
| 225595_at    | CREBZF                 | 0.390162569 |
| 223274_at    | TCF19                  | 0.381848745 |
| 227031_at    | ---                    | 0.351345872 |
| 1556911_at   | ---                    | 0.232535051 |
| 226633_at    | RAB8B                  | 0.204880876 |
| 227934_at    | ---                    | 0.400761926 |
| 238554_at    | CYB5B                  | 0.337602532 |
| 219763_at    | DENND1A                | 0.321894998 |
| 227896_at    | BCCIP                  | 0.418198095 |
| 218508_at    | DCP1A                  | 0.394224049 |
| 206019_at    | RBM19                  | 0.291404127 |
| 209073_s_at  | NUMB                   | 0.397984262 |
| 205642_at    | CEP110                 | 0.424380304 |
| 238950_at    | ---                    | 0.363072989 |
| 230320_at    | TBRG1                  | 0.369136897 |
| 237737_at    | LOC375010 /// LOC40113 | 0.260619384 |
| 219510_at    | POLQ                   | 0.402550501 |
| 238469_at    | ---                    | 0.293182571 |
| 230178_s_at  | ---                    | 0.250324552 |
| 222905_s_at  | TMEM143                | 0.412857519 |
| 225997_at    | MOBKL1A                | 0.416988377 |
| 1557094_at   | LOC653110 /// LOC72844 | 0.381762339 |
| 243405_at    | ---                    | 0.407558332 |
| 214963_at    | NUP160                 | 0.365118647 |
| 228002_at    | IDI2                   | 0.410552332 |
| 222276_at    | ---                    | 0.339923079 |
| 238078_at    | ---                    | 0.363151566 |
| 228231_at    | ---                    | 0.217307541 |
| 238773_at    | METT5D1                | 0.248419996 |
| 236196_at    | ---                    | 0.319416838 |
| 218174_s_at  | C10orf57               | 0.286063263 |
| 230330_at    | ---                    | 0.254416977 |
| 1561942_x_at | ---                    | 0.410745516 |
| 205476_at    | CCL20                  | 0.44151452  |
| 240466_at    | ---                    | 0.256379655 |
| 217997_at    | PHLDA1                 | 0.243789476 |
| 213805_at    | ABHD5                  | 0.305963748 |
| 203309_s_at  | HPS1                   | 0.318449758 |
| 1568685_at   | ---                    | 0.294655578 |
| 230072_at    | ---                    | 0.334716847 |
| 209604_s_at  | GATA3                  | 0.329053095 |
| 209259_s_at  | SMC3                   | 0.415874249 |

|              |                     |             |
|--------------|---------------------|-------------|
| 218664_at    | MECR                | 0.40433992  |
| 201760_s_at  | WSB2                | 0.321269488 |
| 232181_at    | LOC153346           | 0.405981605 |
| 1556021_at   | LOC144874           | 0.371845267 |
| 230885_at    | SPG7                | 0.36830713  |
| 1553292_s_at | FLJ25006            | 0.214345914 |
| 244688_at    | ---                 | 0.273189423 |
| 215116_s_at  | DNM1                | 0.326079237 |
| 242317_at    | HIGD1A              | 0.395443975 |
| 230640_at    | ---                 | 0.308536873 |
| 228569_at    | PAPOLA              | 0.276450349 |
| 235826_at    | ---                 | 0.329596168 |
| 1555910_at   | PTCD2               | 0.325551031 |
| 212887_at    | SEC23A              | 0.297738357 |
| 241687_at    | ---                 | 0.35461624  |
| 64942_at     | GPR153              | 0.412511847 |
| 1558956_s_at | IFT80               | 0.368462823 |
| 231832_at    | GALNT4              | 0.400049274 |
| 220358_at    | BATF3               | 0.221640976 |
| 239773_at    | GTPBP10             | 0.391203857 |
| 230893_at    | DNAJC21             | 0.30501945  |
| 1554250_s_at | TRIM73              | 0.413936207 |
| 240161_s_at  | CDC20B              | 0.325942522 |
| 219733_s_at  | SLC27A5             | 0.326272171 |
| 31799_at     | ---                 | 0.207881481 |
| 218371_s_at  | PSPC1               | 0.4042307   |
| 226037_s_at  | LOC728198 /// TAF9B | 0.412554506 |
| 210175_at    | C2orf3              | 0.385532385 |
| 214009_at    | MSL3L1              | 0.408524469 |
| 219745_at    | TMEM180             | 0.389141158 |
| 226558_at    | LOC653071           | 0.367552214 |
| 1560156_at   | ---                 | 0.394787896 |
| 238501_at    | ---                 | 0.191533489 |
| 202762_at    | ROCK2               | 0.413156207 |
| 237367_x_at  | CFLAR               | 0.397842337 |
| 204492_at    | ARHGAP11A           | 0.376439213 |
| 230048_at    | ---                 | 0.30838825  |
| 202207_at    | ARL4C               | 0.309988973 |
| 217869_at    | HSD17B12            | 0.313979041 |
| 202293_at    | STAG1               | 0.285098978 |
| 214744_s_at  | ---                 | 0.370971498 |
| 219972_s_at  | C14orf135           | 0.381996437 |
| 230888_at    | WDR91               | 0.366391653 |
| 225348_at    | LOC727922           | 0.398586482 |
| 214332_s_at  | TSFM                | 0.349181377 |

|              |                        |             |
|--------------|------------------------|-------------|
| 231899_at    | ZC3H12C                | 0.345909753 |
| 203596_s_at  | IFIT5                  | 0.410426227 |
| 227809_at    | ZC3H6                  | 0.362309763 |
| 231919_at    | DBT                    | 0.396655892 |
| 244386_at    | ---                    | 0.384728785 |
| 209911_x_at  | HIST1H2BD              | 0.270054912 |
| 204396_s_at  | GRK5                   | 0.31143121  |
| 229097_at    | DIAPH3                 | 0.393824774 |
| 208914_at    | GGA2                   | 0.377094719 |
| 238818_at    | KIAA1429               | 0.38846638  |
| 1562062_at   | KIAA1245 /// LOC728895 | 0.399095086 |
| 227741_at    | PTPLB                  | 0.227439496 |
| 235949_at    | ---                    | 0.323459307 |
| 209362_at    | MED21                  | 0.362470701 |
| 227777_at    | C10orf18               | 0.373977332 |
| 226381_at    | PS1TP4                 | 0.278911336 |
| 201462_at    | SCRN1                  | 0.308456632 |
| 202388_at    | RGS2                   | 0.219169975 |
| 203996_s_at  | C21orf2                | 0.305353452 |
| 231967_at    | PHF20L1                | 0.309280528 |
| 236277_at    | ---                    | 0.290395503 |
| 239824_s_at  | TMEM107                | 0.330701571 |
| 229425_at    | ---                    | 0.37474924  |
| 213223_at    | RPL28                  | 0.322834208 |
| 225487_at    | TMEM18                 | 0.367739929 |
| 225085_at    | USP40                  | 0.378672673 |
| 225859_at    | BIRC4                  | 0.315968341 |
| 242586_at    | FSD1L                  | 0.144999753 |
| 238637_at    | ---                    | 0.336335863 |
| 200054_at    | LOC442240 /// ZNF259   | 0.371410835 |
| 242303_at    | ---                    | 0.368617291 |
| 1560981_a_at | PPARA                  | 0.31884192  |
| 203970_s_at  | PEX3                   | 0.365641823 |
| 222589_at    | NLK                    | 0.301917692 |
| 236721_at    | ALKBH1                 | 0.383798729 |
| 241392_at    | TMEM39A                | 0.404927282 |
| 227751_at    | PDCD5                  | 0.313622043 |
| 238768_at    | LOC388969              | 0.224874836 |
| 226380_at    | PTPN21                 | 0.281651226 |
| 243918_at    | ---                    | 0.35759927  |
| 225856_at    | ---                    | 0.268206721 |
| 235893_at    | ---                    | 0.180173118 |
| 209892_at    | FUT4                   | 0.315927862 |
| 212061_at    | SR140                  | 0.389626398 |
| 227547_at    | ---                    | 0.382607793 |

|              |                  |             |
|--------------|------------------|-------------|
| 228433_at    | FLJ11236         | 0.302156665 |
| 65472_at     | ---              | 0.221411127 |
| 225762_x_at  | LOC284801        | 0.315683481 |
| 228590_at    | PTCD3            | 0.401059095 |
| 229131_at    | ---              | 0.39663024  |
| 225160_x_at  | MGC5370          | 0.395126426 |
| 244368_x_at  | ---              | 0.213368839 |
| 227255_at    | PDIK1L           | 0.366166106 |
| 223434_at    | GBP3             | 0.173261961 |
| 235309_at    | RPS15A           | 0.234092144 |
| 203502_at    | BPGM             | 0.345493177 |
| 228464_at    | ---              | 0.383056893 |
| 244687_at    | DBT              | 0.376429479 |
| 205676_at    | CYP27B1          | 0.153148855 |
| 205992_s_at  | IL15             | 0.340548691 |
| 203685_at    | BCL2             | 0.227711529 |
| 1560739_a_at | ---              | 0.230437741 |
| 241730_at    | ---              | 0.342203435 |
| 238785_at    | ---              | 0.390270431 |
| 228700_at    | ---              | 0.21167161  |
| 1564360_a_at | LOC339260        | 0.392330019 |
| 202594_at    | LEPROTL1         | 0.302805308 |
| 235647_at    | AP4S1            | 0.324456524 |
| 212913_at    | C6orf26 /// MSH5 | 0.3864406   |
| 219294_at    | CENPQ            | 0.33162785  |
| 201449_at    | TIA1             | 0.3036641   |
| 1565577_s_at | ---              | 0.302187272 |
| 239823_at    | ---              | 0.213247391 |
| 204349_at    | MED7             | 0.342588827 |
| 1555114_at   | ATP6V0A2         | 0.397344793 |
| 205761_s_at  | DUS4L            | 0.387535177 |
| 210542_s_at  | SLCO3A1          | 0.316710557 |
| 235759_at    | ---              | 0.135062178 |
| 1556414_at   | C21orf71         | 0.173153371 |
| 241375_at    | ---              | 0.22315675  |
| 226081_at    | LZIC             | 0.217017796 |
| 239866_at    | ---              | 0.324558262 |
| 205214_at    | STK17B           | 0.379015705 |
| 226713_at    | CCDC50           | 0.237818797 |
| 217612_at    | TIMM50           | 0.376970766 |
| 230836_at    | ST8SIA4          | 0.332635983 |
| 1554062_at   | XG               | 0.258312108 |
| 238903_at    | LOC137886        | 0.286750773 |
| 1554839_at   | CIDEC            | 0.286091207 |
| 236075_s_at  | ---              | 0.191032735 |



|             |          |             |
|-------------|----------|-------------|
| 204698_at   | ISG20    | 0.280569905 |
| 227174_at   | WDR72    | 0.263404884 |
| 230177_at   | ---      | 0.317357306 |
| 244660_at   | ELAVL1   | 0.266201169 |
| 204788_s_at | PPOX     | 0.394313402 |
| 228334_x_at | KIAA1712 | 0.32163452  |
| 218490_s_at | ZNF302   | 0.350526931 |
| 229633_at   | INTS10   | 0.36135173  |
| 225971_at   | ---      | 0.271729989 |
| 222517_at   | AP3M1    | 0.346612935 |
| 206026_s_at | TNFAIP6  | 0.342717006 |
| 1569894_at  | PPP2R3C  | 0.374786788 |
| 230039_at   | ---      | 0.220239382 |
| 229182_at   | ---      | 0.351127138 |
| 230118_at   | ---      | 0.154381884 |
| 229366_at   | ---      | 0.358757466 |
| 225426_at   | ---      | 0.314248992 |
| 218519_at   | SLC35A5  | 0.371864534 |
| 230020_at   | ---      | 0.280444423 |
| 213935_at   | ABHD5    | 0.328982859 |
| 229779_at   | COL4A4   | 0.369724784 |
| 242304_at   | WIBG     | 0.387998087 |
| 238867_at   | TMEM182  | 0.221452299 |
| 225066_at   | ---      | 0.220435562 |
| 226501_at   | XPNPEP3  | 0.340586371 |
| 1559942_at  | MDFIC    | 0.325079351 |
| 233214_at   | ---      | 0.363852283 |
| 242607_at   | ---      | 0.35767445  |
| 204369_at   | PIK3CA   | 0.285845114 |
| 228646_at   | PPP1R1C  | 0.339477973 |
| 205844_at   | VNN1     | 0.282580118 |
| 228693_at   | CCDC50   | 0.226007735 |
| 238592_at   | PDLIM3   | 0.352387049 |
| 229882_at   | RPS15A   | 0.314551807 |
| 222394_at   | PDCD6IP  | 0.360411468 |
| 231953_at   | BPTF     | 0.319061719 |
| 229267_at   | ---      | 0.367198786 |
| 230100_x_at | PAK1     | 0.207352636 |
| 241840_at   | ---      | 0.196959389 |
| 203349_s_at | ETV5     | 0.337299456 |
| 225949_at   | NRBP2    | 0.298118194 |
| 235890_at   | ---      | 0.238345671 |
| 228131_at   | ERCC1    | 0.361313709 |
| 241031_at   | FAM148A  | 0.161472095 |
| 216247_at   | ---      | 0.305031421 |

|             |           |             |
|-------------|-----------|-------------|
| 229226_at   | ---       | 0.289561731 |
| 238524_at   | ---       | 0.366677758 |
| 239134_at   | ---       | 0.339546946 |
| 242370_at   | MTHFD2L   | 0.363246712 |
| 212234_at   | ASXL1     | 0.36353515  |
| 205673_s_at | ASB9      | 0.264055334 |
| 1552607_at  | CXorf52   | 0.200828435 |
| 204027_s_at | METTL1    | 0.218947602 |
| 229785_at   | KRIT1     | 0.286181202 |
| 223545_at   | FANCD2    | 0.349969212 |
| 238860_at   | C6orf130  | 0.339524496 |
| 1552485_at  | LACTB     | 0.305117932 |
| 202250_s_at | WDR42A    | 0.344423036 |
| 216856_s_at | ---       | 0.38287126  |
| 228209_at   | ---       | 0.288399906 |
| 200613_at   | AP2M1     | 0.293249561 |
| 237563_s_at | LOC440731 | 0.371412882 |
| 228523_at   | NANOS1    | 0.233879103 |
| 203358_s_at | EZH2      | 0.323959034 |
| 230917_at   | ---       | 0.261931535 |
| 236321_at   | LOC285550 | 0.298491578 |
| 212982_at   | ZDHHC17   | 0.322241232 |
| 213278_at   | MTMR9     | 0.256987516 |
| 228206_at   | HS3ST4    | 0.334067366 |
| 244704_at   | NFYB      | 0.303771256 |
| 202875_s_at | PBX2      | 0.376568257 |
| 238704_at   | ---       | 0.376062749 |
| 225832_s_at | DAGLB     | 0.337127977 |
| 203048_s_at | KIAA0372  | 0.383104835 |
| 204569_at   | ICK       | 0.315245656 |
| 236076_at   | LOC257396 | 0.219549893 |
| 212936_at   | C5orf21   | 0.241960994 |
| 1563369_at  | FLJ42957  | 0.343728523 |
| 224767_at   | RPL37     | 0.308069193 |
| 242887_at   | KCMF1     | 0.345112875 |
| 225228_at   | TMEM77    | 0.30887151  |
| 222682_s_at | C5orf3    | 0.26569743  |
| 217647_at   | ---       | 0.281402826 |
| 212394_at   | KIAA0090  | 0.345645744 |
| 223503_at   | TMEM163   | 0.119008245 |
| 215008_at   | TLL2      | 0.311334704 |
| 1552698_at  | MGC16703  | 0.379125116 |
| 202580_x_at | FOXMI     | 0.358939051 |
| 238813_at   | ---       | 0.29632027  |
| 208725_at   | EIF2S2    | 0.285602328 |

|              |              |             |
|--------------|--------------|-------------|
| 225116_at    | HIPK2        | 0.366049087 |
| 206157_at    | PTX3         | 0.288561054 |
| 230494_at    | SLC20A1      | 0.373211581 |
| 223704_s_at  | DMRT2        | 0.286123698 |
| 224835_at    | RP5-1022P6.2 | 0.234370395 |
| 231183_s_at  | JAG1         | 0.371082819 |
| 242486_at    | ---          | 0.159768551 |
| 226098_at    | IFT80        | 0.304511854 |
| 238191_at    | ---          | 0.330203157 |
| 238953_at    | ---          | 0.376371929 |
| 243785_at    | ---          | 0.217925549 |
| 213411_at    | ADAM22       | 0.347559899 |
| 238633_at    | EPC1         | 0.278851583 |
| 244391_at    | TSEN2        | 0.319433924 |
| 235612_at    | ---          | 0.300436564 |
| 210587_at    | INHBE        | 0.280626977 |
| 232083_at    | C20orf23     | 0.269338301 |
| 1558605_at   | ---          | 0.321026247 |
| 213215_at    | ---          | 0.254570843 |
| 226594_at    | ---          | 0.300413429 |
| 207147_at    | DLX2         | 0.303712461 |
| 215303_at    | ---          | 0.278454954 |
| 213256_at    | 39510        | 0.376580122 |
| 219626_at    | MAP7D3       | 0.23289169  |
| 227046_at    | SLC39A11     | 0.338369045 |
| 238190_at    | TUFM         | 0.284384939 |
| 244033_at    | C14orf145    | 0.311962056 |
| 1552790_a_at | TLOC1        | 0.333937076 |
| 217662_x_at  | ---          | 0.345156416 |
| 1555900_at   | ---          | 0.254318698 |
| 218915_at    | NF2          | 0.364488717 |
| 240214_at    | ---          | 0.119243208 |
| 235260_s_at  | C4orf28      | 0.33622547  |
| 202802_at    | DHPS         | 0.325970731 |
| 213054_at    | KIAA0841     | 0.33224816  |
| 231827_at    | ---          | 0.263720459 |
| 244841_at    | SEC24A       | 0.200000493 |
| 235394_at    | ---          | 0.328041157 |
| 227945_at    | TBC1D1       | 0.322472119 |
| 243463_s_at  | RIT1         | 0.349173927 |
| 1568873_at   | ZNF519       | 0.374032679 |
| 214764_at    | RRP15        | 0.274239322 |
| 227306_at    | ---          | 0.302373102 |
| 200676_s_at  | UBE2L3       | 0.245658866 |
| 224830_at    | NUDT21       | 0.299588755 |

|             |                          |             |
|-------------|--------------------------|-------------|
| 229242_at   | ---                      | 0.362436192 |
| 244616_x_at | MGC5370                  | 0.248009048 |
| 226602_s_at | BCR /// FLJ42953 /// LOC | 0.269452575 |
| 236127_at   | ---                      | 0.206710068 |
| 228149_at   | FLJ31818                 | 0.319858526 |
| 214157_at   | GNAS                     | 0.118110529 |
| 212632_at   | STX7                     | 0.368669844 |
| 229549_at   | ---                      | 0.371981132 |
| 241453_at   | PTK2                     | 0.278194957 |
| 209512_at   | HSDL2                    | 0.362228136 |
| 226577_at   | ---                      | 0.22322507  |
| 231069_at   | ---                      | 0.253695964 |
| 211031_s_at | CLIP2                    | 0.312506073 |
| 226258_at   | AMN1                     | 0.261679509 |
| 202904_s_at | LSM5                     | 0.363804792 |
| 214783_s_at | ANXA11                   | 0.358643777 |
| 228469_at   | PPID                     | 0.27500549  |
| 213296_at   | RER1                     | 0.364511259 |
| 238666_at   | ---                      | 0.36126168  |
| 226696_at   | RBBP9                    | 0.194222561 |
| 238147_at   | TRIM46                   | 0.291093009 |
| 230139_at   | ---                      | 0.269840284 |
| 208814_at   | HSPA4                    | 0.2629703   |
| 212174_at   | AK2                      | 0.358661839 |
| 1553612_at  | ---                      | 0.368613589 |
| 227543_at   | RNASEH2C                 | 0.275052328 |
| 226181_at   | TUBE1                    | 0.315065312 |
| 239207_at   | JARID1C                  | 0.34690545  |
| 212427_at   | KIAA0368                 | 0.228589564 |
| 242294_at   | FBXO45                   | 0.302391005 |
| 228452_at   | C17orf39                 | 0.274078082 |
| 225633_at   | DPY19L3                  | 0.236688306 |
| 238030_at   | ---                      | 0.362998271 |
| 227605_at   | ---                      | 0.247200337 |
| 225845_at   | ZBTB44                   | 0.285565599 |
| 236555_at   | LOC643749                | 0.287189711 |
| 218935_at   | EHD3                     | 0.239101974 |
| 51774_s_at  | LOC222070                | 0.328725725 |
| 222438_at   | MED4                     | 0.307698377 |
| 218653_at   | SLC25A15                 | 0.230398227 |
| 202951_at   | STK38                    | 0.288215258 |
| 214194_at   | DIS3                     | 0.358168979 |
| 212173_at   | AK2                      | 0.294726873 |
| 238065_at   | TPM3                     | 0.220610242 |
| 222476_at   | CNOT6                    | 0.235381943 |

|              |                     |             |
|--------------|---------------------|-------------|
| 235068_at    | ZDHHC21             | 0.285934598 |
| 228605_at    | ---                 | 0.203493327 |
| 226458_at    | ---                 | 0.350619919 |
| 228310_at    | ENAH                | 0.121191336 |
| 228395_at    | GLT8D1              | 0.217774471 |
| 217967_s_at  | FAM129A             | 0.223448201 |
| 225516_at    | SLC7A2              | 0.211987863 |
| 238462_at    | UBASH3B             | 0.283282776 |
| 220397_at    | MDM1                | 0.355472545 |
| 239050_s_at  | ---                 | 0.325166932 |
| 212133_at    | NIPA2               | 0.275508804 |
| 235926_at    | ---                 | 0.318713769 |
| 226719_at    | ---                 | 0.297263527 |
| 224938_at    | NUFIP2              | 0.305232363 |
| 212184_s_at  | MAP3K7IP2           | 0.327695821 |
| 243328_at    | ---                 | 0.337083841 |
| 219056_at    | RNASEH2B            | 0.206554324 |
| 226532_at    | ---                 | 0.16199727  |
| 237145_at    | EIF2AK4             | 0.234595117 |
| 1554997_a_at | PTGS2               | 0.35803264  |
| 232149_s_at  | NSMAF               | 0.346239393 |
| 221878_at    | LOC388969           | 0.1638016   |
| 230791_at    | ---                 | 0.331495231 |
| 208920_at    | SRI                 | 0.261951955 |
| 227630_at    | ---                 | 0.283377029 |
| 239857_at    | ---                 | 0.250650439 |
| 218488_at    | EIF2B3              | 0.304760116 |
| 202876_s_at  | PBX2                | 0.271788392 |
| 229810_at    | ---                 | 0.2687532   |
| 228245_s_at  | LOC728715 /// OVOS2 | 0.305186429 |
| 236449_at    | CSTB                | 0.187499345 |
| 220418_at    | UBASH3A             | 0.161187045 |
| 230502_s_at  | LOC149832           | 0.357094606 |
| 228070_at    | ---                 | 0.346527457 |
| 228380_at    | ---                 | 0.181214204 |
| 224686_x_at  | ARL17P1             | 0.336626263 |
| 227247_at    | ---                 | 0.220211896 |
| 238823_at    | FMNL3               | 0.250525521 |
| 223482_at    | TMEM120A            | 0.250083882 |
| 237802_at    | XKR4                | 0.211880433 |
| 226443_at    | FAM122A             | 0.343432608 |
| 204837_at    | MTMR9               | 0.256286462 |
| 212023_s_at  | MKI67               | 0.263640196 |
| 222804_x_at  | WDR32               | 0.332066604 |
| 211122_s_at  | CXCL11              | 0.269914413 |

|              |           |             |
|--------------|-----------|-------------|
| 224860_at    | C9orf123  | 0.279410227 |
| 1553167_a_at | SEPSECS   | 0.291304778 |
| 207291_at    | PRRG4     | 0.266490722 |
| 215215_s_at  | LOC81691  | 0.343081014 |
| 225886_at    | ---       | 0.274116776 |
| 238587_at    | UBASH3B   | 0.260037693 |
| 200988_s_at  | PSME3     | 0.351330449 |
| 203090_at    | SDF2      | 0.348573826 |
| 214794_at    | PA2G4     | 0.329131498 |
| 212871_at    | MAPKAPK5  | 0.322201328 |
| 1554043_a_at | ---       | 0.219035382 |
| 1555952_at   | SLC19A1   | 0.29997464  |
| 218181_s_at  | MAP4K4    | 0.251541144 |
| 222412_s_at  | SSR3      | 0.257848289 |
| 1560738_at   | ---       | 0.160041715 |
| 227181_at    | LNP1      | 0.35035482  |
| 220741_s_at  | PPA2      | 0.293928273 |
| 227961_at    | CTSB      | 0.282264255 |
| 212214_at    | OPA1      | 0.264660118 |
| 230782_at    | LOC653381 | 0.300487311 |
| 222881_at    | HPSE      | 0.117182572 |
| 227731_at    | ---       | 0.304092766 |
| 228603_at    | ---       | 0.136454114 |
| 238615_at    | ERLIN2    | 0.329652425 |
| 223707_at    | RPL27A    | 0.20555227  |
| 203130_s_at  | KIF5C     | 0.245268328 |
| 235051_at    | CCDC50    | 0.222483494 |
| 229415_at    | CYCS      | 0.307010816 |
| 224364_s_at  | PPIL3     | 0.19097694  |
| 219130_at    | CCDC76    | 0.2548052   |
| 230031_at    | HSPA5     | 0.276164471 |
| 229544_at    | ---       | 0.304836055 |
| 228555_at    | CAMK2D    | 0.279157211 |
| 203007_x_at  | LYPLA1    | 0.303534843 |
| 227982_at    | ---       | 0.232400585 |
| 225448_at    | NAPG      | 0.335062236 |
| 225179_at    | UBE2K     | 0.089846553 |
| 202512_s_at  | ATG5      | 0.198523448 |
| 223651_x_at  | CDC23     | 0.264364184 |
| 213035_at    | ANKRD28   | 0.290245624 |
| 227718_at    | PURB      | 0.303959341 |
| 242826_at    | ---       | 0.12872796  |
| 212192_at    | KCTD12    | 0.15748867  |
| 213130_at    | ZNF473    | 0.23220501  |
| 229572_at    | ---       | 0.23080499  |

235296\_at

EIF5A2

0.221990118
