# Supplementary material for: Enhancer of Zeste homolog 2 (EZH2) is overexpressed in recurrent nasopharyngeal carcinoma and is regulated by miR-26a, miR-101, and miR-98
Source: PubMed Central journal article supplement — Cell Death Dis. 2010 Oct 21;1(10):e85–. doi: 10.1038/cddis.2010.64 (PMC3035896; doi:10.1038/cddis.2010.64), 2010-10-21
Supplement: cddis201064x6.pdf [file cddis201064x6.pdf]

**Supplementary Table 2. List of differentially expressed genes (>2-fold change) between C666-1 cells transfected with siEZH2+ 4 Gy RT, compared to control cells + 4 Gy RT, at 72 hrs post-transfection.**

| Probe ID     | Gene Symbol          | Fold Change |
|--------------|----------------------|-------------|
| 204734_at    | KRT15                | 23.8178     |
| 1559584_a_at | C16orf54 /// hCG_164 | 14.41481    |
| 207935_s_at  | KRT13                | 13.20488    |
| 201341_at    | ENC1                 | 10.70625    |
| 205044_at    | GABRP                | 11.86056    |
| 201012_at    | ANXA1                | 11.35268    |
| 203407_at    | PPL                  | 8.18506     |
| 228835_at    | ---                  | 7.714197    |
| 209800_at    | KRT16                | 7.735605    |
| 1554830_a_at | STEAP3               | 6.895001    |
| 212925_at    | C19orf21             | 6.736003    |
| 231849_at    | KRT80                | 6.167937    |
| 211580_s_at  | PIK3R3               | 7.456008    |
| 226333_at    | IL6R                 | 5.251545    |
| 209173_at    | AGR2                 | 5.862267    |
| 214142_at    | ZG16                 | 5.634611    |
| 228640_at    | PCDH7                | 5.834217    |
| 240964_at    | ---                  | 5.717948    |
| 220237_at    | ATG3                 | 8.493845    |
| 212417_at    | SCAMP1               | 5.824543    |
| 203907_s_at  | IQSEC1               | 4.567305    |
| 212807_s_at  | SORT1                | 4.957934    |
| 213665_at    | SOX4                 | 4.719934    |
| 213413_at    | STON1                | 3.40724     |
| 1558404_at   | LOC644242            | 4.19699     |
| 238622_at    | RAP2B                | 3.379212    |
| 231478_at    | PDE4C                | 3.872863    |
| 228457_at    | ---                  | 5.497203    |
| 243349_at    | KIAA1324             | 4.718698    |
| 209030_s_at  | CADM1                | 3.326908    |
| 206404_at    | FGF9                 | 3.595885    |
| 226688_at    | C3orf23              | 4.242644    |
| 241905_at    | PIK3C2A              | 3.344226    |
| 212636_at    | QKI                  | 4.184523    |
| 202968_s_at  | DYRK2                | 3.211493    |
| 221962_s_at  | UBE2H                | 3.514257    |
| 225659_at    | SPOPL                | 3.945801    |
| 207980_s_at  | CITED2               | 3.085187    |
| 202924_s_at  | PLAGL2               | 7.473127    |
| 204525_at    | PHF14                | 3.679502    |
| 243702_at    | ---                  | 4.937184    |
| 241718_x_at  | ---                  | 6.353836    |
| 243278_at    | FOXP2                | 3.08582     |

|              |               |          |
|--------------|---------------|----------|
| 231283_at    | MGAT4A        | 3.073014 |
| 219218_at    | BAHCC1        | 2.970778 |
| 220195_at    | MBD5          | 2.842466 |
| 221994_at    | PDLIM5        | 2.920732 |
| 222891_s_at  | BCL11A        | 2.824322 |
| 244441_at    | ---           | 2.890339 |
| 235798_at    | RP11-679B17.1 | 2.867008 |
| 213485_s_at  | ABCC10        | 2.928444 |
| 203665_at    | HMOX1         | 3.3436   |
| 57715_at     | FAM26B        | 3.761197 |
| 225658_at    | SPOPL         | 2.800925 |
| 228762_at    | LFNG          | 2.834554 |
| 207069_s_at  | SMAD6         | 3.024104 |
| 219520_s_at  | WWC3          | 2.769735 |
| 208606_s_at  | WNT4          | 3.758719 |
| 220940_at    | KIAA1641      | 3.244968 |
| 219498_s_at  | BCL11A        | 3.227735 |
| 201393_s_at  | IGF2R         | 6.284793 |
| 226615_at    | ---           | 3.163225 |
| 229553_at    | PGM2L1        | 2.597177 |
| 235453_at    | TOR1AIP2      | 2.577105 |
| 222585_x_at  | KRCC1         | 2.93197  |
| 238045_at    | TMEM65        | 2.849015 |
| 205398_s_at  | SMAD3         | 3.610029 |
| 203167_at    | TIMP2         | 3.845546 |
| 239010_at    | DUXAP10       | 3.93015  |
| 213664_at    | SLC1A1        | 3.61472  |
| 210048_at    | NAPG          | 3.126002 |
| 211708_s_at  | SCD           | 2.503183 |
| 224725_at    | MIB1          | 2.788696 |
| 204179_at    | MB            | 2.51739  |
| 204542_at    | ST6GALNAC2    | 2.700739 |
| 204602_at    | DKK1          | 2.48094  |
| 201911_s_at  | FARP1         | 2.963396 |
| 203451_at    | LDB1          | 2.501921 |
| 236097_at    | ---           | 3.064892 |
| 227490_at    | WDFY2         | 2.964734 |
| 212731_at    | ANKRD46       | 2.438439 |
| 203420_at    | FAM8A1        | 2.591769 |
| 1553102_a_at | CCDC69        | 2.604876 |
| 209650_s_at  | TBC1D22A      | 2.385518 |
| 221280_s_at  | PARD3         | 2.407341 |
| 242981_at    | ---           | 3.018004 |
| 1553960_at   | SNX21         | 3.468895 |
| 203285_s_at  | HS2ST1        | 2.609092 |
| 1554360_at   | FCHSD2        | 3.759121 |
| 202761_s_at  | SYNE2         | 3.479751 |

|              |           |          |
|--------------|-----------|----------|
| 1558017_s_at | ---       | 5.002735 |
| 218342_s_at  | ERMP1     | 2.661873 |
| 1565951_s_at | CHML      | 4.993031 |
| 225739_at    | RAB11FIP4 | 2.317056 |
| 236029_at    | FAT3      | 3.349017 |
| 211889_x_at  | CEACAM1   | 2.726363 |
| 223385_at    | CYP2S1    | 2.327044 |
| 238164_at    | USP6NL    | 3.801478 |
| 204863_s_at  | IL6ST     | 11.79951 |
| 211404_s_at  | APLP2     | 2.476798 |
| 1554110_at   | CDCP1     | 2.929331 |
| 229256_at    | PGM2L1    | 9.205247 |
| 219677_at    | SPSB1     | 3.99172  |
| 212912_at    | RPS6KA2   | 3.862618 |
| 227549_x_at  | ZDHHC24   | 3.461208 |
| 214077_x_at  | MEIS3P1   | 2.854102 |
| 230580_at    | ---       | 2.381987 |
| 219171_s_at  | ZNF236    | 2.252876 |
| 205128_x_at  | PTGS1     | 2.426505 |
| 225008_at    | ---       | 2.664357 |
| 206580_s_at  | EFEMP2    | 2.55171  |
| 209333_at    | ULK1      | 2.56209  |
| 239802_at    | LOC56755  | 2.260549 |
| 222886_at    | ---       | 2.601649 |
| 235258_at    | DCP2      | 5.962633 |
| 244471_x_at  | PANX2     | 2.889416 |
| 1552928_s_at | MAP3K7IP3 | 3.524827 |
| 225481_at    | FRMD6     | 2.795887 |
| 218093_s_at  | ANKRD10   | 2.25651  |
| 218904_s_at  | C9orf40   | 2.623619 |
| 209357_at    | CITED2    | 2.679211 |
| 226382_at    | LOC283070 | 2.385807 |
| 203283_s_at  | HS2ST1    | 2.343486 |
| 212729_at    | DLG3      | 2.773031 |
| 210087_s_at  | MPZL1     | 2.216051 |
| 229699_at    | ---       | 2.890584 |
| 204109_s_at  | NFYA      | 2.34541  |
| 1559052_s_at | PAK2      | 4.249599 |
| 206576_s_at  | CEACAM1   | 2.331763 |
| 216417_x_at  | HOXB9     | 2.489074 |
| 225989_at    | HERC4     | 2.827261 |
| 39548_at     | NPAS2     | 2.883704 |
| 204604_at    | PFTK1     | 2.509731 |
| 211000_s_at  | IL6ST     | 2.637681 |
| 214931_s_at  | SRPK2     | 2.164293 |
| 200878_at    | EPAS1     | 2.209278 |
| 225632_s_at  | RAB43     | 2.768324 |

|              |          |          |
|--------------|----------|----------|
| 218137_s_at  | SMAP1    | 2.560725 |
| 230643_at    | WNT9A    | 5.445072 |
| 209254_at    | KIAA0265 | 2.664271 |
| 205634_x_at  | ZDHHC24  | 2.722167 |
| 227134_at    | SYTL1    | 2.227053 |
| 201416_at    | SOX4     | 2.627034 |
| 209712_at    | SLC35D1  | 2.597686 |
| 207904_s_at  | LNPEP    | 2.137964 |
| 209705_at    | MTF2     | 3.196983 |
| 212196_at    | IL6ST    | 2.539465 |
| 233589_x_at  | C9orf167 | 2.165695 |
| 228845_at    | P76      | 2.315875 |
| 232020_at    | SMURF2   | 2.717743 |
| 225912_at    | TP53INP1 | 2.998576 |
| 220991_s_at  | RNF32    | 2.120334 |
| 204359_at    | FLRT2    | 2.092587 |
| 219616_at    | ACSS3    | 2.224467 |
| 205416_s_at  | ATXN3    | 4.708254 |
| 225328_at    | ---      | 5.346989 |
| 207836_s_at  | RBPMS    | 2.263388 |
| 206799_at    | SCGB1D2  | 3.193866 |
| 244548_at    | ---      | 2.306964 |
| 221541_at    | CRISPLD2 | 3.318293 |
| 212845_at    | SAMD4A   | 2.735748 |
| 226794_at    | STXBP5   | 3.106548 |
| 225623_at    | KIAA1737 | 2.077749 |
| 208653_s_at  | CD164    | 2.354781 |
| 222693_at    | FNDC3B   | 2.125523 |
| 203390_s_at  | KIF3C    | 2.15173  |
| 212717_at    | PLEKHM1  | 2.267349 |
| 242727_at    | ARL5B    | 3.301188 |
| 220201_at    | RC3H2    | 2.078809 |
| 229513_at    | STRBP    | 2.904235 |
| 207761_s_at  | METTL7A  | 2.462884 |
| 228708_at    | RAB27B   | 2.055593 |
| 228567_at    | ---      | 3.713051 |
| 229509_at    | MFSD8    | 2.217868 |
| 234452_at    | HIBADH   | 2.083896 |
| 232366_at    | KIAA0232 | 3.886314 |
| 213435_at    | SATB2    | 2.251395 |
| 219583_s_at  | SPATA7   | 3.436268 |
| 1568951_at   | ZNF280D  | 2.247836 |
| 200770_s_at  | LAMC1    | 2.259369 |
| 215813_s_at  | PTGS1    | 2.170101 |
| 243024_at    | ZNF789   | 2.218144 |
| 1559205_s_at | ---      | 2.322666 |
| 212335_at    | GNS      | 2.223174 |

|              |                       |          |
|--------------|-----------------------|----------|
| 214814_at    | YTHDC1                | 2.925936 |
| 213654_at    | TAF5L                 | 7.941561 |
| 203158_s_at  | GLS                   | 3.1727   |
| 238067_at    | TBC1D8B               | 2.133999 |
| 212489_at    | COL5A1                | 2.724145 |
| 1569827_at   | ATG7                  | 2.455455 |
| 216804_s_at  | PDLIM5                | 3.85573  |
| 235567_at    | LOC283666             | 4.658905 |
| 231997_at    | TBCEL                 | 3.103136 |
| 1559266_s_at | C10orf140 /// LOC7304 | 2.166061 |
| 243918_at    | ---                   | 0.474375 |
| 202875_s_at  | PBX2                  | 0.386174 |
| 203195_s_at  | NUP98                 | 0.465961 |
| 236696_at    | SR140                 | 0.476683 |
| 213734_at    | WSB2                  | 0.433519 |
| 232990_at    | FAM104B               | 0.420888 |
| 224688_at    | C7orf42               | 0.422434 |
| 201518_at    | CBX1                  | 0.439003 |
| 205306_x_at  | KMO                   | 0.438439 |
| 235630_at    | ---                   | 0.413316 |
| 242149_at    | C18orf19              | 0.477656 |
| 239825_at    | ---                   | 0.467688 |
| 235785_at    | ---                   | 0.440938 |
| 215078_at    | SOD2                  | 0.400335 |
| 206640_x_at  | GAGE12C /// GAGE12D   | 0.488935 |
| 207086_x_at  | CTD-2248C21.2 /// GAG | 0.472675 |
| 202876_s_at  | PBX2                  | 0.378385 |
| 222824_at    | ---                   | 0.440336 |
| 205726_at    | DIAPH2                | 0.418068 |
| 228254_at    | ---                   | 0.458027 |
| 218481_at    | EXOSC5                | 0.443608 |
| 230133_at    | RC3H2                 | 0.404405 |
| 238841_at    | PTPDC1                | 0.371821 |
| 1556060_a_at | KIAA1702              | 0.318229 |
| 227907_at    | ---                   | 0.379169 |
| 203170_at    | KIAA0409              | 0.475654 |
| 201760_s_at  | WSB2                  | 0.408976 |
| 227623_at    | ---                   | 0.471096 |
| 208895_s_at  | DDX18                 | 0.493061 |
| 235436_at    | ---                   | 0.474984 |
| 1553736_at   | CCDC131               | 0.428395 |
| 227864_s_at  | FAM125A               | 0.387908 |
| 210417_s_at  | PI4KB                 | 0.414628 |
| 226558_at    | LOC653071             | 0.434853 |
| 218504_at    | FAHD2A                | 0.428429 |
| 240440_at    | NPL                   | 0.429204 |
| 225430_at    | GATC                  | 0.466903 |

|              |                      |          |
|--------------|----------------------|----------|
| 1556613_s_at | LOC203107            | 0.332368 |
| 230219_at    | ---                  | 0.476875 |
| 238887_at    | ---                  | 0.47118  |
| 208155_x_at  | GAGE1 /// GAGE12G // | 0.462258 |
| 200841_s_at  | EPRS                 | 0.391682 |
| 235793_at    | ---                  | 0.474782 |
| 212427_at    | KIAA0368             | 0.329137 |
| 234992_x_at  | ECT2                 | 0.366644 |
| 208235_x_at  | GAGE12F /// GAGE12G  | 0.450435 |
| 217869_at    | HSD17B12             | 0.420588 |
| 230692_at    | LOC157503            | 0.334593 |
| 214816_x_at  | C19orf40             | 0.307471 |
| 236503_at    | ---                  | 0.484709 |
| 209092_s_at  | GLOD4                | 0.442349 |
| 204349_at    | MED7                 | 0.439949 |
| 228149_at    | FLJ31818             | 0.438348 |
| 219702_at    | PLAC1                | 0.417445 |
| 233068_at    | ---                  | 0.431472 |
| 243785_at    | ---                  | 0.47514  |
| 230380_at    | THAP2                | 0.392786 |
| 211122_s_at  | CXCL11               | 0.454875 |
| 235498_at    | LRRRC44              | 0.41561  |
| 241782_at    | NEBL                 | 0.483017 |
| 213248_at    | LOC730101            | 0.435747 |
| 222476_at    | CNOT6                | 0.326667 |
| 239484_at    | ---                  | 0.462104 |
| 228569_at    | PAPOLA               | 0.474164 |
| 236606_at    | ---                  | 0.445433 |
| 223050_s_at  | FBXW5                | 0.45678  |
| 235117_at    | CHAC2                | 0.298649 |
| 240214_at    | ---                  | 0.451974 |
| 227285_at    | C1orf51              | 0.312711 |
| 235296_at    | EIF5A2               | 0.359083 |
| 1564475_s_at | LOC728723            | 0.35051  |
| 209304_x_at  | GADD45B              | 0.469431 |
| 210705_s_at  | TRIM5                | 0.454438 |
| 232790_at    | ---                  | 0.363938 |
| 213279_at    | DHRS1                | 0.398256 |
| 206025_s_at  | TNFAIP6              | 0.358337 |
| 227961_at    | CTSB                 | 0.380821 |
| 242770_at    | ---                  | 0.456601 |
| 203701_s_at  | TRMT1                | 0.452591 |
| 227213_at    | ADAT2                | 0.402582 |
| 213223_at    | RPL28                | 0.467188 |
| 1556340_at   | MAPK12               | 0.373438 |
| 241808_at    | ---                  | 0.441536 |
| 218653_at    | SLC25A15             | 0.344254 |

|             |           |          |
|-------------|-----------|----------|
| 204669_s_at | RNF24     | 0.434354 |
| 209893_s_at | FUT4      | 0.393906 |
| 226156_at   | AKT2      | 0.427924 |
| 238813_at   | ---       | 0.448283 |
| 243924_at   | ---       | 0.459489 |
| 51774_s_at  | LOC222070 | 0.447446 |
| 236204_at   | ---       | 0.380817 |
| 203183_s_at | SMARCD1   | 0.418925 |
| 238818_at   | KIAA1429  | 0.428251 |
| 208920_at   | SRI       | 0.436975 |
| 244641_at   | C7orf30   | 0.260641 |
| 225895_at   | SYNPO2    | 0.435971 |
| 238633_at   | EPC1      | 0.301433 |
| 225971_at   | ---       | 0.402747 |
| 209161_at   | PRPF4     | 0.463514 |
| 219703_at   | MNS1      | 0.46066  |
| 207291_at   | PRRG4     | 0.45201  |
| 221946_at   | C9orf116  | 0.421882 |
| 229375_at   | ---       | 0.27317  |
| 1559827_at  | LOC401074 | 0.425767 |
| 201556_s_at | VAMP2     | 0.370976 |
| 232171_x_at | KLHDC4    | 0.286717 |
| 214231_s_at | KIAA0564  | 0.446848 |
| 219636_s_at | ARMC9     | 0.393605 |
| 226193_x_at | CBWD1     | 0.358237 |
| 227882_at   | FKRP      | 0.446957 |
| 200676_s_at | UBE2L3    | 0.434343 |
| 220038_at   | SGK3      | 0.414187 |
| 227103_s_at | ECE2      | 0.442031 |
| 1557945_at  | TCTE3     | 0.362223 |
| 205673_s_at | ASB9      | 0.376319 |
| 212887_at   | SEC23A    | 0.423579 |
| 227098_at   | DUSP18    | 0.342898 |
| 238822_at   | ---       | 0.304094 |
| 218935_at   | EHD3      | 0.408485 |
| 214951_at   | SLC26A10  | 0.453055 |
| 232256_s_at | LOC401321 | 0.312793 |
| 236772_s_at | ---       | 0.405911 |
| 214232_at   | ---       | 0.349285 |
| 213887_s_at | POLR2E    | 0.2828   |
| 230234_at   | ---       | 0.293005 |
| 210175_at   | C2orf3    | 0.428207 |
| 236817_at   | ADAT2     | 0.282263 |
| 218562_s_at | TMEM57    | 0.291619 |
| 203007_x_at | LYPLA1    | 0.231712 |
| 241375_at   | ---       | 0.377446 |
| 212133_at   | NIPA2     | 0.386976 |

|             |          |          |
|-------------|----------|----------|
| 228153_at   | RNF144B  | 0.360743 |
| 212583_at   | AQR      | 0.361211 |
| 218362_s_at | DIS3     | 0.320941 |
| 224364_s_at | PPIL3    | 0.37565  |
| 205677_s_at | DLEU1    | 0.438967 |
| 222412_s_at | SSR3     | 0.353563 |
| 232576_at   | ---      | 0.413823 |
| 220773_s_at | GPHN     | 0.269455 |
| 205844_at   | VNN1     | 0.346755 |
| 238190_at   | TUFM     | 0.368483 |
| 220472_at   | ZCCHC4   | 0.297793 |
| 224860_at   | C9orf123 | 0.280494 |
| 229572_at   | ---      | 0.347593 |
| 207446_at   | TLR6     | 0.410986 |
| 220054_at   | IL23A    | 0.415087 |
| 228013_at   | ---      | 0.399542 |
| 229384_at   | ---      | 0.379425 |
| 238773_at   | METT5D1  | 0.378846 |
| 235674_at   | KIAA0922 | 0.347554 |
| 1552789_at  | TLOC1    | 0.310435 |
| 244627_at   | DAK      | 0.352959 |
| 208023_at   | TNFRSF4  | 0.390608 |
| 237083_at   | ---      | 0.327644 |
| 228167_at   | KLHL6    | 0.373245 |
| 219626_at   | MAP7D3   | 0.274496 |
| 235452_at   | ---      | 0.39097  |
| 228603_at   | ---      | 0.369151 |
| 242826_at   | ---      | 0.333447 |
| 209750_at   | NR1D2    | 0.365311 |
| 209315_at   | HBS1L    | 0.435143 |
| 204837_at   | MTMR9    | 0.311214 |
| 213278_at   | MTMR9    | 0.398183 |
| 213998_s_at | DDX17    | 0.325573 |
| 202669_s_at | EFNB2    | 0.423412 |
| 224843_at   | SLAIN2   | 0.420708 |
| 204548_at   | STAR     | 0.35194  |
| 209281_s_at | ATP2B1   | 0.353881 |
| 229672_at   | UQCC     | 0.347813 |
| 227605_at   | ---      | 0.353595 |
| 218371_s_at | PSPC1    | 0.350089 |
| 217997_at   | PHLDA1   | 0.306369 |
| 221944_at   | FLJ42627 | 0.390198 |
| 231827_at   | ---      | 0.434658 |
| 205141_at   | ANG      | 0.310932 |
| 213989_x_at | SETD4    | 0.425338 |
| 242264_at   | ---      | 0.395727 |
| 229014_at   | FLJ42709 | 0.422345 |



|             |                   |          |
|-------------|-------------------|----------|
| 219759_at   | ERAP2             | 0.357487 |
| 231730_at   | SEPSECS           | 0.298781 |
| 217647_at   | ---               | 0.386597 |
| 217896_s_at | NIP30             | 0.426919 |
| 225255_at   | MRPL35            | 0.398567 |
| 206685_at   | HCG4              | 0.347578 |
| 202407_s_at | PRPF31            | 0.361113 |
| 239240_at   | ---               | 0.417436 |
| 228160_at   | LOC400642         | 0.294963 |
| 229466_at   | LOC256273         | 0.400542 |
| 1568873_at  | ZNF519            | 0.374869 |
| 236700_at   | EIF3C             | 0.384894 |
| 220513_at   | KHDC1             | 0.283327 |
| 222796_at   | PTCD1             | 0.342663 |
| 238469_at   | ---               | 0.251913 |
| 204252_at   | CDK2              | 0.394848 |
| 224822_at   | DLC1              | 0.409731 |
| 204329_s_at | ZNF202            | 0.366005 |
| 213805_at   | ABHD5             | 0.357678 |
| 222434_at   | ENAH              | 0.350568 |
| 204350_s_at | MED7              | 0.257701 |
| 213880_at   | LGR5              | 0.388077 |
| 223707_at   | RPL27A            | 0.195421 |
| 200613_at   | AP2M1             | 0.271194 |
| 209162_s_at | PRPF4             | 0.224447 |
| 210102_at   | LOH11CR2A         | 0.310934 |
| 210284_s_at | MAP3K7IP2         | 0.359177 |
| 236090_at   | ---               | 0.348283 |
| 238729_x_at | LOC646561         | 0.387335 |
| 212192_at   | KCTD12            | 0.273615 |
| 233021_at   | ---               | 0.337718 |
| 213215_at   | ---               | 0.186818 |
| 225066_at   | ---               | 0.40274  |
| 244035_at   | ---               | 0.256855 |
| 203088_at   | FBLN5             | 0.232011 |
| 228380_at   | ---               | 0.280085 |
| 232613_at   | PBRM1             | 0.390016 |
| 215116_s_at | DNM1              | 0.269942 |
| 209368_at   | EPHX2             | 0.240663 |
| 202512_s_at | ATG5              | 0.179959 |
| 228693_at   | CCDC50            | 0.354839 |
| 242540_at   | C11orf47          | 0.27894  |
| 230100_x_at | PAK1              | 0.35941  |
| 1555964_at  | ARL17 /// ARL17P1 | 0.261841 |
| 226532_at   | ---               | 0.365023 |
| 238867_at   | TMEM182           | 0.259956 |
| 1556414_at  | C21orf71          | 0.312901 |

|              |           |          |
|--------------|-----------|----------|
| 1554493_s_at | THADA     | 0.387241 |
| 209702_at    | FTO       | 0.240828 |
| 228068_at    | C10orf132 | 0.33574  |
| 207201_s_at  | SLC22A1   | 0.308037 |
| 213333_at    | MDH2      | 0.247065 |
| 239823_at    | ---       | 0.20754  |
| 203685_at    | BCL2      | 0.302525 |
| 227472_at    | DDA1      | 0.364743 |
| 209846_s_at  | BTN3A2    | 0.310168 |
| 226713_at    | CCDC50    | 0.289395 |
| 236095_at    | NTRK2     | 0.211995 |
| 226696_at    | RBBP9     | 0.202641 |
| 213938_at    | ERC2      | 0.241629 |
| 1554671_a_at | SRRM2     | 0.357799 |
| 220418_at    | UBASH3A   | 0.365749 |
| 217651_at    | ---       | 0.314412 |
| 225856_at    | ---       | 0.225549 |
| 206547_s_at  | PPEF1     | 0.260634 |
| 208776_at    | PSMD11    | 0.293645 |
| 230178_s_at  | ---       | 0.358965 |
| 236075_s_at  | ---       | 0.231431 |
| 206510_at    | SIX2      | 0.232094 |
| 222916_s_at  | HDLBP     | 0.173768 |
| 1554875_at   | C2orf34   | 0.30377  |
| 1558290_a_at | PVT1      | 0.317535 |
| 229588_at    | DNAJC10   | 0.338532 |
| 223434_at    | GBP3      | 0.323485 |
| 1556696_s_at | FLJ42709  | 0.33555  |
| 228231_at    | ---       | 0.318935 |
| 1554043_a_at | ---       | 0.2266   |
| 223641_at    | ---       | 0.260766 |
| 219424_at    | EBI3      | 0.304995 |
| 217856_at    | RBM8A     | 0.367083 |
| 210587_at    | INHBE     | 0.302836 |
| 236887_at    | KIN       | 0.293584 |
| 229957_at    | TMEM91    | 0.284825 |
| 1554248_at   | ZNF638    | 0.313615 |
| 241825_at    | C2orf60   | 0.201573 |
| 204949_at    | ICAM3     | 0.272818 |
| 203996_s_at  | C21orf2   | 0.348915 |
| 227747_at    | ---       | 0.328235 |
| 202388_at    | RGS2      | 0.311434 |
| 232569_at    | ---       | 0.18515  |
| 237802_at    | XKR4      | 0.273344 |
| 221878_at    | LOC388969 | 0.245415 |
| 201506_at    | TGFBI     | 0.229578 |
| 212613_at    | BTN3A2    | 0.333198 |

|              |           |          |
|--------------|-----------|----------|
| 206157_at    | PTX3      | 0.222569 |
| 220358_at    | BATF3     | 0.283069 |
| 214234_s_at  | CYP3A5    | 0.323098 |
| 205307_s_at  | KMO       | 0.284922 |
| 219056_at    | RNASEH2B  | 0.287305 |
| 202859_x_at  | IL8       | 0.197187 |
| 205676_at    | CYP27B1   | 0.148071 |
| 214157_at    | GNAS      | 0.237859 |
| 217790_s_at  | SSR3      | 0.23719  |
| 225179_at    | UBE2K     | 0.207458 |
| 228310_at    | ENAH      | 0.28707  |
| 228548_at    | ---       | 0.276779 |
| 209889_at    | SEC31B    | 0.274539 |
| 227741_at    | PTPLB     | 0.105675 |
| 233305_at    | NECAB1    | 0.288439 |
| 225109_at    | ---       | 0.183198 |
| 226081_at    | LZIC      | 0.177132 |
| 1552607_at   | CXorf52   | 0.178915 |
| 207176_s_at  | CD80      | 0.251837 |
| 222881_at    | HPSE      | 0.236879 |
| 223503_at    | TMEM163   | 0.302746 |
| 1570388_a_at | LOC440896 | 0.262016 |
| 209541_at    | IGF1      | 0.120638 |
