# Supplementary material for: Enhancer of Zeste homolog 2 (EZH2) is overexpressed in recurrent nasopharyngeal carcinoma and is regulated by miR-26a, miR-101, and miR-98
Source: PubMed Central journal article supplement — Cell Death Dis. 2010 Oct 21;1(10):e85–. doi: 10.1038/cddis.2010.64 (PMC3035896; doi:10.1038/cddis.2010.64), 2010-10-21
Supplement: cddis201064x7.pdf [file cddis201064x7.pdf]

**Supplementary Table 3. Functional annotation for genes that were differentially expressed in EZH2-depleted cells**

| Category | Term                                                                             | Count | %      | P Value  |
|----------|----------------------------------------------------------------------------------|-------|--------|----------|
|          | GOTERM_BP_AL.GO:0008219~cell death                                               | 36    | 7.86%  | 1.89E-04 |
|          | GOTERM_BP_AL.GO:0016265~death                                                    | 36    | 7.86%  | 1.89E-04 |
|          | GOTERM_BP_AL.GO:0006915~apoptosis                                                | 34    | 7.42%  | 2.74E-04 |
|          | GOTERM_BP_AL.GO:0012501~programmed cell death                                    | 34    | 7.42%  | 3.23E-04 |
|          | GOTERM_BP_AL.GO:0048522~positive regulation of cellular process                  | 40    | 8.73%  | 3.32E-04 |
|          | GOTERM_BP_AL.GO:0042981~regulation of apoptosis                                  | 26    | 5.68%  | 3.67E-04 |
|          | GOTERM_BP_AL.GO:0043067~regulation of programmed cell death                      | 26    | 5.68%  | 4.36E-04 |
|          | GOTERM_BP_AL.GO:0006950~response to stress                                       | 42    | 9.17%  | 4.47E-04 |
|          | GOTERM_BP_AL.GO:0048518~positive regulation of biological process                | 42    | 9.17%  | 7.02E-04 |
|          | GOTERM_BP_AL.GO:0051649~establishment of cellular localization                   | 35    | 7.64%  | 0.001045 |
|          | GOTERM_BP_AL.GO:0050794~regulation of cellular process                           | 124   | 27.07% | 0.001345 |
|          | GOTERM_BP_AL.GO:0051641~cellular localization                                    | 35    | 7.64%  | 0.001668 |
|          | GOTERM_BP_AL.GO:0046907~intracellular transport                                  | 29    | 6.33%  | 0.00228  |
|          | GOTERM_BP_AL.GO:0050789~regulation of biological process                         | 130   | 28.38% | 0.002681 |
|          | GOTERM_BP_AL.GO:0006917~induction of apoptosis                                   | 13    | 2.84%  | 0.002735 |
|          | GOTERM_BP_AL.GO:0012502~induction of programmed cell death                       | 13    | 2.84%  | 0.002829 |
|          | GOTERM_BP_AL.GO:0009719~response to endogenous stimulus                          | 19    | 4.15%  | 0.003665 |
|          | GOTERM_BP_AL.GO:0008152~metabolic process                                        | 227   | 49.56% | 0.003933 |
|          | GOTERM_BP_AL.GO:0043065~positive regulation of apoptosis                         | 14    | 3.06%  | 0.004215 |
|          | GOTERM_BP_AL.GO:0043068~positive regulation of programmed cell death             | 14    | 3.06%  | 0.004492 |
|          | GOTERM_BP_AL.GO:0043123~positive regulation of I-kappaB kinase/NF-kappaB cascade | 8     | 1.75%  | 0.004962 |
|          | GOTERM_BP_AL.GO:0044238~primary metabolic process                                | 207   | 45.20% | 0.005305 |
|          | GOTERM_BP_AL.GO:0006974~response to DNA damage stimulus                          | 16    | 3.49%  | 0.005536 |
|          | GOTERM_BP_AL.GO:0009987~cellular process                                         | 303   | 66.16% | 0.005548 |
|          | GOTERM_BP_AL.GO:0048523~negative regulation of cellular process                  | 39    | 8.52%  | 0.006037 |
|          | GOTERM_BP_AL.GO:0009889~regulation of biosynthetic process                       | 12    | 2.62%  | 0.006245 |
|          | GOTERM_BP_AL.GO:0009967~positive regulation of signal transduction               | 10    | 2.18%  | 0.006802 |
|          | GOTERM_BP_AL.GO:0048519~negative regulation of biological process                | 40    | 8.73%  | 0.007038 |
|          | GOTERM_BP_AL.GO:0043122~regulation of I-kappaB kinase/NF-kappaB cascade          | 8     | 1.75%  | 0.007672 |
|          | GOTERM_BP_AL.GO:0031326~regulation of cellular biosynthetic process              | 11    | 2.40%  | 0.009143 |
|          | GOTERM_BP_AL.GO:0043283~biopolymer metabolic process                             | 140   | 30.57% | 0.009472 |
|          | GOTERM_BP_AL.GO:0048468~cell development                                         | 41    | 8.95%  | 0.009911 |
|          | GOTERM_BP_AL.GO:0065007~biological regulation                                    | 137   | 29.91% | 0.010043 |
|          | GOTERM_BP_AL.GO:0043170~macromolecule metabolic process                          | 181   | 39.52% | 0.011299 |
|          | GOTERM_BP_AL.GO:0044237~cellular metabolic process                               | 204   | 44.54% | 0.011486 |
|          | GOTERM_BP_AL.GO:0043627~response to estrogen stimulus                            | 4     | 0.87%  | 0.011927 |
|          | GOTERM_BP_AL.GO:0044248~cellular catabolic process                               | 23    | 5.02%  | 0.012718 |
|          | GOTERM_BP_AL.GO:0006396~RNA processing                                           | 19    | 4.15%  | 0.012909 |
|          | GOTERM_BP_AL.GO:0045184~establishment of protein localization                    | 27    | 5.90%  | 0.013775 |
|          | GOTERM_BP_AL.GO:0010467~gene expression                                          | 100   | 21.83% | 0.013859 |
|          | GOTERM_BP_AL.GO:0022613~ribonucleoprotein complex biogenesis and assembly        | 11    | 2.40%  | 0.01456  |
|          | GOTERM_BP_AL.GO:0016070~RNA metabolic process                                    | 84    | 18.34% | 0.014865 |
|          | GOTERM_BP_AL.GO:0008104~protein localization                                     | 28    | 6.11%  | 0.01577  |
|          | GOTERM_BP_AL.GO:0006886~intracellular protein transport                          | 17    | 3.71%  | 0.017902 |
|          | GOTERM_BP_AL.GO:0006979~response to oxidative stress                             | 7     | 1.53%  | 0.019261 |
|          | GOTERM_BP_AL.GO:0016043~cellular component organization and biogenesis           | 76    | 16.59% | 0.019942 |
|          | GOTERM_BP_AL.GO:0015031~protein transport                                        | 25    | 5.46%  | 0.020591 |
|          | GOTERM_BP_AL.GO:0006996~organelle organization and biogenesis                    | 38    | 8.30%  | 0.021843 |
|          | GOTERM_BP_AL.GO:0044265~cellular macromolecule catabolic process                 | 15    | 3.28%  | 0.024294 |
|          | GOTERM_BP_AL.GO:0042221~response to chemical stimulus                            | 22    | 4.80%  | 0.027038 |
|          | GOTERM_BP_AL.GO:0007243~protein kinase cascade                                   | 16    | 3.49%  | 0.028014 |
|          | GOTERM_BP_AL.GO:0009966~regulation of signal transduction                        | 21    | 4.59%  | 0.029045 |
|          | GOTERM_BP_AL.GO:0051098~regulation of binding                                    | 4     | 0.87%  | 0.030125 |
|          | GOTERM_BP_AL.GO:0009059~macromolecule biosynthetic process                       | 30    | 6.55%  | 0.03034  |
|          | GOTERM_BP_AL.GO:0033036~macromolecule localization                               | 28    | 6.11%  | 0.03134  |
|          | GOTERM_BP_AL.GO:0007249~I-kappaB kinase/NF-kappaB cascade                        | 8     | 1.75%  | 0.031904 |
|          | GOTERM_BP_AL.GO:0030154~cell differentiation                                     | 53    | 11.57% | 0.033051 |
|          | GOTERM_BP_AL.GO:0048869~cellular developmental process                           | 53    | 11.57% | 0.033051 |
|          | GOTERM_BP_AL.GO:0006281~DNA repair                                               | 12    | 2.62%  | 0.03452  |

|                                                                                      |    |        |          |
|--------------------------------------------------------------------------------------|----|--------|----------|
| GOTERM_BP_AL:GO:0006417~regulation of translation                                    | 9  | 1.97%  | 0.038851 |
| GOTERM_BP_AL:GO:0043285~biopolymer catabolic process                                 | 14 | 3.06%  | 0.04016  |
| GOTERM_BP_AL:GO:0051179~localization                                                 | 84 | 18.34% | 0.04124  |
| GOTERM_BP_AL:GO:0006613~cotranslational protein targeting to membrane                | 3  | 0.66%  | 0.04197  |
| GOTERM_BP_AL:GO:0022618~protein-RNA complex assembly                                 | 7  | 1.53%  | 0.043078 |
| GOTERM_BP_AL:GO:0010039~response to iron ion                                         | 2  | 0.44%  | 0.043528 |
| GOTERM_BP_AL:GO:0051128~regulation of cellular component organization and biogenesis | 6  | 1.31%  | 0.046515 |
| GOTERM_BP_AL:GO:0048545~response to steroid hormone stimulus                         | 4  | 0.87%  | 0.047327 |
